# Supplementary material for: Suicide as an incident of severe patient harm: a retrospective cohort study of investigations after suicide in Swedish healthcare in a 13-year perspective
Source: PubMed Central journal article supplement (PMC7944973; doi:10.1136/bmjopen-2020-044068), 2021-03-08
Supplement: bmjopen-2020-044068.draft_revisions.pdf [file bmjopen-2020-044068.draft_revisions.pdf]

# BMJ Open

BMJ Open is committed to open peer review. As part of this commitment we make the peer review history of every article we publish publicly available.

When an article is published we post the peer reviewers' comments and the authors' responses online. We also post the versions of the paper that were used during peer review. These are the versions that the peer review comments apply to.

The versions of the paper that follow are the versions that were submitted during the peer review process. They are not the versions of record or the final published versions. They should not be cited or distributed as the published version of this manuscript.

BMJ Open is an open access journal and the full, final, typeset and author-corrected version of record of the manuscript is available on our site with no access controls, subscription charges or pay-per-view fees (<http://bmjopen.bmj.com>).

If you have any questions on BMJ Open's open peer review process please email [info.bmjopen@bmj.com](mailto:info.bmjopen@bmj.com)

# BMJ Open

## Suicide as an incident of severe patient harm – a retrospective review of investigations of the healthcare provided to patients prior to their suicide

|                               |                                                                                                                                                                                                                                                                                                                                                                                                   |
|-------------------------------|---------------------------------------------------------------------------------------------------------------------------------------------------------------------------------------------------------------------------------------------------------------------------------------------------------------------------------------------------------------------------------------------------|
| Journal:                      | <i>BMJ Open</i>                                                                                                                                                                                                                                                                                                                                                                                   |
| Manuscript ID                 | bmjopen-2020-044068                                                                                                                                                                                                                                                                                                                                                                               |
| Article Type:                 | Original research                                                                                                                                                                                                                                                                                                                                                                                 |
| Date Submitted by the Author: | 24-Aug-2020                                                                                                                                                                                                                                                                                                                                                                                       |
| Complete List of Authors:     | Fröding, Elin; Jönköping University; Region Jönköpings län<br>Gäre, Boel Andersson; Jönköping University; Region Jönköpings län<br>Westrin, Åsa; Lund University Department of Clinical Sciences Malmö,<br>Division of Psychiatry, Lund University ; Psychiatry Research Skåne,<br>Office for Psychiatry and Habilitation, Region Skåne<br>Ros, Axel; Jönköping University; Region Jönköpings län |
| Keywords:                     | Health & safety < HEALTH SERVICES ADMINISTRATION & MANAGEMENT, Quality in health care < HEALTH SERVICES ADMINISTRATION & MANAGEMENT, Risk management < HEALTH SERVICES ADMINISTRATION & MANAGEMENT, Suicide & self-harm < PSYCHIATRY                                                                                                                                                              |
|                               |                                                                                                                                                                                                                                                                                                                                                                                                   |

SCHOLARONE™  
Manuscripts

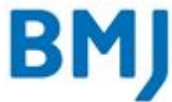

I, the Submitting Author has the right to grant and does grant on behalf of all authors of the Work (as defined in the below author licence), an exclusive licence and/or a non-exclusive licence for contributions from authors who are: i) UK Crown employees; ii) where BMJ has agreed a CC-BY licence shall apply, and/or iii) in accordance with the terms applicable for US Federal Government officers or employees acting as part of their official duties; on a worldwide, perpetual, irrevocable, royalty-free basis to BMJ Publishing Group Ltd ("BMJ") its licensees and where the relevant Journal is co-owned by BMJ to the co-owners of the Journal, to publish the Work in this journal and any other BMJ products and to exploit all rights, as set out in our [licence](#).

The Submitting Author accepts and understands that any supply made under these terms is made by BMJ to the Submitting Author unless you are acting as an employee on behalf of your employer or a postgraduate student of an affiliated institution which is paying any applicable article publishing charge ("APC") for Open Access articles. Where the Submitting Author wishes to make the Work available on an Open Access basis (and intends to pay the relevant APC), the terms of reuse of such Open Access shall be governed by a Creative Commons licence – details of these licences and which [Creative Commons](#) licence will apply to this Work are set out in our licence referred to above.

Other than as permitted in any relevant BMJ Author's Self Archiving Policies, I confirm this Work has not been accepted for publication elsewhere, is not being considered for publication elsewhere and does not duplicate material already published. I confirm all authors consent to publication of this Work and authorise the granting of this licence.

## Title page

# Suicide as an incident of severe patient harm – a retrospective review of investigations of the healthcare provided to patients prior to their suicide

### Authors

PhD. Elin Fröding, Prof. Boel Andersson Gäre, Prof. Åsa Westrin, MD. Axel Ros

### Corresponding author

Name and address: Elin Fröding, Högländssjukhuset Hus 34 pl 4, 575 81 Eksjö, Sweden

Mail and phone number: [Elin.froding@rjl.se](mailto:Elin.froding@rjl.se), +4670-3577396

### Co-authors

Prof. Boel Andersson Gäre, Jönköping University, Jönköping, Sweden

Prof. Åsa Westrin, Lund University, Lund, Sweden

MD. Axel Ros, Jönköping University, Jönköping, Sweden

### Key words

Health & safety, patient safety, risk management, quality in health care, suicide

### Word count

3892

## ABSTRACT

### Objectives

The reporting of suicides among recipients of healthcare services has been mandatory in Sweden since 2006-2017. This study, adopting a 13-year perspective, aimed to explore how this mandatory reporting has influenced associated investigations conducted by the healthcare services, and also examined the lessons obtained, and whether any suicide-prevention-related improvements in terms of patient safety had followed.

### Design and settings

This is a retrospective study of reports from Swedish primary and secondary healthcare after suicide to the regulatory authority in Sweden. Three cohorts of suicide cases, each from a different time period, were chosen for analysis. Complete reports of the incident investigations conducted by the healthcare providers with associated patient records and the subsequent decisions of the supervisory authority were analyzed by using a coding scheme.

### Results

The investigations largely adopted a microsystem perspective, focusing on final patient contact, throughout the overall study period. Updating existing or developing new routines as well as educational actions had been increasingly proposed, while sharing conclusions across departments was rarely recommended.

### Conclusions

The mandatory reporting of suicides as potential cases of patient harm was shown to be restricted to information transfer between healthcare providers and the supervisory authority, rather than fostering participative improvement of patient safety for suicidal patients.

The similarity in outcomes across the cohorts, regardless of changes in legislation, suggests that the investigations were adapted to suit the structure of the authority's reports rather than the specific incident type, and that no new service improvements or lessons are being identified.

To develop more sophisticated infrastructures for investigation, learning, and information-sharing, it is necessary to learn more about preconditions and complexity in the analysis of suicides and the suicidal process.

A shift in investigations' recommendations and reports should be encouraged, to also include learning from successfully treated and resolved suicide-related crises.

### Strengths and limitations of the study

- To our knowledge, this is the first evaluation of the outcomes of investigations of specific types of patient harm over time, here exemplified by suicide.
- All investigations concerned the same kind of incident; suicides, and the data were population-based.

- All data were based on the healthcare providers' investigations and reports to the supervisory authority, the content in these reports is regulated by law; however, the quality of analysis differs, which was not evaluated in this study.
- All data collection and categorization were conducted by only one researcher, which was vulnerable to bias, however; this ensured a high level of consistency.

## BACKGROUND

Deaths that occur as a result of patient harm represent a contrast to healthcare services' aim of a high level of patient safety, and such incidents can serve as powerful motivators for learning and improvement.<sup>1 2</sup> In recent decades, efforts to increase patient safety have been intensified. In particular, the reporting and investigating of cases of severe patient injury in order to identify risks and improve patient safety have become widespread safety-improvement strategies.<sup>2</sup> This reflects a Safety-I perspective regarding patient safety, and assumes that adverse outcomes are caused by identifiable failures or malfunctions of specific components different from situations when things go right.<sup>3 4</sup> Similarly, root cause analysis (RCA) has become one of the most widespread tools used in the investigation of healthcare-related incidents, and presumes that such incidents can be explained by linear cause-effect chains.<sup>5 6</sup> Determining what had happened and why an incident occurred should not be the final goal of an incident investigation; the identification of gaps in service provision and means of improving relevant areas of the healthcare organization are important for improving safety.<sup>7</sup> To successfully learn from past incidents, methods to sustainably record and share relevant data are essential.<sup>8 9</sup> However, prior studies have shown that, in healthcare, post-incident investigations usually provide little learning beyond the staff and units involved.<sup>10 11</sup> Thus, the actual value of incident-reporting systems and the RCA approach in healthcare has been questioned.<sup>8 12-15</sup> With the introduction of new concepts in patient safety, such as Safety-II and resilient healthcare, new approaches for improving healthcare have focused on learning from all occurrences in daily practice: to identify both those factors that support a good outcome and those that increase the risk of patient harm.<sup>3 4</sup>

Swedish law states that events with severe patient harm, as well as events involving risk of severe patient harm, that could have been avoided if appropriate actions had been taken by healthcare professionals, should be reported to the supervisory authority.<sup>16</sup> This report to the authority should be preceded by an investigation, conducted by the healthcare providing organization, of the healthcare services provided to the patient before the adverse event. The content of the investigation is regulated by law, and requires identification of the contributory causes of the incident and of service improvements that may prevent the reoccurrence of such an incident.

Suicide is a global health problem with an estimated 800 000 deaths worldwide every year.<sup>17</sup> A large proportion of the individuals who die from suicide have close contact with healthcare professionals in the time before their deaths.<sup>18 19</sup> Further, post-suicide psychological autopsies have found that approximately 90% of suicide victims have psychiatric illnesses at the time of their deaths.<sup>20</sup> This suggests that healthcare professionals play an important role in suicide prevention.<sup>21-23</sup>

In an effort to understand whether failures in any area of the healthcare system have contributed to suicide, and in an attempt to improve suicide-prevention, the Swedish National Board of Health and Welfare in 2006 stipulated that all suicides that occur among patients who were receiving healthcare or were in contact with healthcare services within the four weeks preceding the event must be reported to the authority by the healthcare provider.<sup>24</sup> This remained mandatory regardless of whether the provider determined the suicide to be preventable. In September 2017, this regulation was updated to state that only suicides regarded as "severe patient harm" (i.e., preventable) must be reported to the supervisory authority.<sup>25</sup>

1  
2  
3 Before 2011, the supervisory authority performed their own investigations of incidents, and had the  
4 power to reprimand the provider and responsible staff. The role of the supervisory authority changed  
5 in 2011, when the Swedish Patient Safety Act (2010:659)<sup>16</sup> was implemented. This new law made  
6 healthcare organizations responsible for patient-safety improvement, and the role of the supervisory  
7 authority was changed to review the investigations made by the providers, and ensure that they were  
8 satisfactorily fulfilled and that appropriate actions had been taken to ensure a high level of patient  
9 safety. In particular, the authority determines whether the healthcare provider has fulfilled their  
10 legislated duties, or whether there are shortcomings in the investigation, in which case the authority  
11 may recommend revisions or conduct a site visit to inspect the healthcare provider.  
12  
13

14 To our knowledge, there are no published evaluations of the outcomes of investigations of specific  
15 types of patient harm over time, here exemplified by suicide.  
16

17 The objective of this study was to explore how mandatory reporting of suicide cases as incidents of  
18 potential patient harm has influenced the investigations of healthcare systems. To perform this, a 13-  
19 year perspective was adopted, and the lessons and possible improvements for patient safety regarding  
20 suicide prevention were examined.  
21  
22

## 23 **METHODS**

### 24 **Cases**

25  
26 Three cohorts of suicide cases, each from a different time period, that were reported to the supervisory  
27 authority were chosen for analysis. Cohort 1 comprised the cases reported to the supervisory authority  
28 in 2006, from the time the reporting of suicides became mandatory, to 2007 (n = 279). Cohort 2  
29 comprised all suicides reported in 2015, this represented a period when mandatory reporting was well-  
30 established among healthcare providers (n = 436). Cohort 3 comprised all reported suicides from  
31 September 1, 2017, which was the time the law regarding reporting was changed, to November 30,  
32 2019 (n = 316).  
33  
34  
35

36 Complete reports of the incident investigations conducted by the healthcare providers with associated  
37 patient records and the subsequent decisions of the supervisory authority were obtained from the  
38 supervisory authority. Every individual suicide case was given a code number and the patient's  
39 demographic data and treatment received in the months preceding his/her death were registered. Major  
40 diagnoses were documented and coded in accordance with the International Statistical Classification  
41 of Diseases and related Health Problems, 10<sup>th</sup> revision (i.e., ICD-10).  
42  
43

### 44 **Categorization of data**

45 A coding scheme was used to categorize the contributory causes of the respective suicides, the actions  
46 reported in the investigations and the decisions of the authority. The same coding scheme was used in  
47 a prior study of reported suicide cases in Sweden.<sup>11</sup> This scheme is based on the general categories  
48 used in the most common method of investigating adverse events in Swedish healthcare, which is in  
49 turn based on RCA.<sup>26</sup> To make the categorization more specific, four of the major categories were  
50 divided into additional subcategories. The categories are shown in table 2 and 3. Every category was  
51 described and exemplified and a category of "others" was added in case none of the other categories  
52 was considered appropriate. In this present study, the contributory causes were reported as  
53 "deficiencies." Meanwhile, an "action" was defined as any intervention performed in attempt to  
54 prevent new suicides: therefor, actions taken to prevent reported suicides (telephone calls,  
55 resuscitations) or actions aimed at informing family members or staff that a suicide had occurred were  
56 not registered as actions in this study. Separate notes were made when a deficiency or action was  
57 related to a healthcare-service routine, as well as in regard to how learning from the investigation was  
58  
59  
60

described. To ensure consistency, all data collection and categorization were conducted by only one researcher (EF), a psychiatrist with extensive experience in patient-safety issues.

### **Organizational levels**

Classification of the organizational levels of deficiencies and actions was conducted to better understand where in the organizational system the identified deficiencies and actions were situated. The deficiencies and actions were coded based on a micro-meso-macro-perspective.<sup>27</sup> Microsystems were defined as the basic elements of the healthcare services provided for the patient, such as the inpatient or outpatient care unit. The mesosystem encompassed interactions between different microsystem units, such as cooperation between departments or different healthcare providers. The macrosystem involved the entire healthcare system, such as legislation, political prioritizations, and national policies on healthcare. For each case, the highest organizational level for each deficiency and action was coded.

### **Supervisory authority**

The mandate stipulated to the authority by legislation differed between cohort 1 and cohorts 2 and 3, hence the formulation of the decisions also differed. In this paper, to facilitate comparison among these outcomes, for all cohorts only decisions categorized as “immediate approval” and “inspection” were noted, as these remained unchanged. A note was made if a physician employed by the supervisory authority was involved in the decision-making.

### **Statistical analyses**

Frequencies for each category, organizational hierarchal level of deficiencies and actions, and decisions of the supervisory authority were analyzed per individual and aggregated per cohort.

Chi-square tests of independence were used to compare the number of new routines and the absence of routines within the same cohort, as well as the proportion of the organizational hierarchy of deficiencies and actions between cohorts. We considered a two-sided p value of  $< 0.05$  to indicate statistical significance. As the pre-requisites differed between the cohorts, no further statistical analyses to compare the cohorts were judged to be possible.

The statistical analyses were performed using IBM SPSS Statistics 24.

### **Ethical review**

According to the Swedish *Act Concerning the Ethical Review of Research Involving Humans* (2003:460) and an advisory opinion from the Regional Ethical Review Board (no. 2017/234), this study did not require an ethical review as it did not include human participants.

### **Patient and Public Involvement**

Patients or public were not involved in this study.

## **RESULTS**

### **Cases**

Demographic data for the cases showed similarities across the cohorts, with a dominance of men and a majority of cases reported by psychiatric care. One-fourth of the cases died from suicide within one day of their last contact with a healthcare professional; half of the cases died from suicide within 2-4 days of their last contact. For details, see Table 1.



**Table 1.** Characteristics of the suicide cases reported to the supervisory authority across the three cohorts. The data in the table comprise numbers and percentages, n (%).

|                                                                                                                                    |                                     | <b>Cohort 1<br/>(n = 279)</b> | <b>Cohort 2 (n<br/>= 436)</b> | <b>Cohort 3 (n =<br/>316)</b> |
|------------------------------------------------------------------------------------------------------------------------------------|-------------------------------------|-------------------------------|-------------------------------|-------------------------------|
| <b>Characteristic</b>                                                                                                              |                                     |                               |                               |                               |
| <b>Age, years</b>                                                                                                                  | Range                               | 15-95                         | 13-93                         | 11-95                         |
|                                                                                                                                    | Percentile 25                       | 36                            | 33                            | 29                            |
|                                                                                                                                    | Percentile 50                       | 50                            | 49                            | 42                            |
|                                                                                                                                    | Percentile 75                       | 64                            | 61                            | 57                            |
| <b>Gender</b>                                                                                                                      | Men                                 | 166 (60)                      | 283 (65)                      | 213 (67)                      |
|                                                                                                                                    | Women                               | 113 (40)                      | 152 (35)                      | 103 (33)                      |
| <b>Reporting<br/>healthcare<br/>service</b>                                                                                        | Psychiatric care                    | 195 (70)                      | 290 (67)                      | 233 (74)                      |
|                                                                                                                                    | Primary care                        | 47 (17)                       | 94 (22)                       | 56 (18)                       |
|                                                                                                                                    | Somatic care                        | 21 (7)                        | 33 (8)                        | 16 (5)                        |
|                                                                                                                                    | Other                               | 16 (6)                        | 18 (4)                        | 11 (3)                        |
| <b>Days between<br/>last contact with<br/>healthcare<br/>services and<br/>death</b>                                                | Range                               | 0-70                          | 0-88                          | 0-240                         |
|                                                                                                                                    | Percentile 25                       | 0                             | 1                             | 0                             |
|                                                                                                                                    | Percentile 50                       | 2                             | 4                             | 3                             |
|                                                                                                                                    | Percentile 75                       | 7                             | 10                            | 9                             |
| <b>Receiving<br/>inpatient care at<br/>time of death</b>                                                                           |                                     | 45 (16)                       | 36 (8)                        | 44 (14)                       |
| <b>Receiving<br/>compulsory<br/>psychiatric<br/>treatment at the<br/>time of death*</b>                                            |                                     | 15 (5)                        | 22 (5)                        | 20 (6)                        |
| <b>Major<br/>psychiatric<br/>diagnosis<br/>documented and<br/>coded in<br/>accordance with<br/>ICD-10 in<br/>patients' records</b> | Total (F00-F98)                     | 228 (82)                      | 371 (85)                      | 288 (91)                      |
|                                                                                                                                    | Affective<br>disorder (F30)         | 119 (43)                      | 153 (35)                      | 105 (33)                      |
|                                                                                                                                    | Anxiety disorder<br>(F40)           | 35 (13)                       | 77 (18)                       | 60 (19)                       |
|                                                                                                                                    | Substance abuse<br>(F10)            | 29 (10)                       | 51 (12)                       | 37 (12)                       |
|                                                                                                                                    | Psychosis (F20)                     | 22 (8)                        | 36 (8)                        | 30 (10)                       |
|                                                                                                                                    | Personality<br>disorder (F60)       | 12 (4)                        | 13 (3)                        | 13 (4)                        |
|                                                                                                                                    | Attention deficit<br>disorder (F90) | 1 (0)                         | 13 (3)                        | 12 (4)                        |
|                                                                                                                                    | Autism spectrum<br>(F84)            | 3 (1)                         | 13 (3)                        | 9 (3)                         |
|                                                                                                                                    | Other                               | 7 (2)                         | 15 (3)                        | 22 (7)                        |
| <b>Suicide-risk<br/>assessment<br/>documented in<br/>patients' records<br/>in the three<br/>months before<br/>death</b>            | Absent                              | 135 (49)                      | 108 (25)                      | 119 (38)                      |
|                                                                                                                                    | Low                                 | 61 (22)                       | 171 (39)                      | 91 (29)                       |
|                                                                                                                                    | Elevated, not<br>acute              | 61 (22)                       | 116 (27)                      | 75 (24)                       |
|                                                                                                                                    | High/acute                          | 19 (7)                        | 41 (9)                        | 31 (10)                       |
| <b>Prior suicide<br/>attempt</b>                                                                                                   |                                     | 120 (46)                      | 204 (47)                      | 154 (49)                      |
| <b>Suicide method</b>                                                                                                              | Hanging                             | 112 (40)                      | 160 (37)                      | 128 (41)                      |
|                                                                                                                                    | Intoxication                        | 42 (15)                       | 110 (25)                      | 53 (17)                       |

|                            |              |          |          |          |
|----------------------------|--------------|----------|----------|----------|
|                            | Jumping      | 21 (8)   | 13 (3)   | 19 (6)   |
|                            | Train        | 11 (4)   | 35 (8)   | 22 (7)   |
|                            | Drowning     | 15 (5)   | 28 (6)   | 13 (4)   |
|                            | Shooting     | 10 (4)   | 27 (6)   | 14 (4)   |
|                            | Others       | 13 (8)   | 12 (3)   | 16 (5)   |
|                            | Not reported | 51 (18)  | 50 (12)  | 51 (16)  |
| <b>Location of suicide</b> | Home         | 154 (56) | 248 (57) | 161 (51) |
|                            | Hospital     | 23 (8)   | 22 (5)   | 33 (10)  |
|                            | Other        | 53 (19)  | 131 (30) | 83 (26)  |
|                            | Not reported | 44 (16)  | 35 (8)   | 39 (12)  |

*Note:* Cohort 1: cases reported in 2006-2007, cohort 2: cases reported in 2015, and cohort 3: cases reported in 2017-2019. ICD-10: International Classification of Diseases and related Health Problems, 10<sup>th</sup> revision.

\* includes both in-patient and out-patient compulsory treatment

### Deficiencies in healthcare

Cohort 3 showed the largest proportion of cases for which deficiencies in healthcare were considered to have contributed to the suicide. In this cohort, only suicide cases considered to involve severe patient harm could have been prevented if different actions had been taken by healthcare professionals were to be reported. Over time, some changes in the proportions for the categories of deficiencies were observed, but they remained centered on final patient contact with healthcare services. In cohort 1 and 2, the most common deficiencies concerned “suicide risk assessment.” In general, in cohort 1 these deficiencies related to an absence of local guidelines for suicide risk assessment, and in cohort 2 to non-adherence to existing guidelines. In cohort 3, deficiencies in “treatment” and “external communication” were the most common. Examples of deficiencies in “treatment” were delayed, or a lack of, follow-up after prescription of medication, or non-adherence to treatment guidelines. Examples of deficiencies in “external information” were a lack of or insufficient information exchange between healthcare providers. For details, see Table 2.

**Table 2.** Proportions of cases with deficiencies, as reported in the post-suicide investigations of the healthcare services’ actions. The data in the table comprise numbers and percentages, n (%).

|                                                     | <b>Cohort 1 (n = 279)</b> | <b>Cohort 2 (n = 436)</b> | <b>Cohort 3 (n = 316)</b> |
|-----------------------------------------------------|---------------------------|---------------------------|---------------------------|
| <b>Cases with deficiencies, total</b>               | 136 (49)                  | 240 (55)                  | 248 (78)                  |
| <b>Category</b>                                     |                           |                           |                           |
| <b>Communication and information</b>                |                           |                           |                           |
| Communication with peers and family members         | 8 (3)                     | 51 (12)                   | 39 (12)                   |
| Documentation                                       | 57 (20)                   | 65 (15)                   | 68 (22)                   |
| External communication                              | 21 (8)                    | 74 (17)                   | 91 (29)                   |
| Internal communication                              | 18 (7)                    | 61 (14)                   | 68 (22)                   |
| <b>Education and competence</b>                     |                           |                           |                           |
| Education and competence not specified              | 12 (4)                    | 54 (11)                   | 50 (16)                   |
| Education and competence in suicide risk assessment | 5 (2)                     | 9 (2)                     | 13 (4)                    |

**Organization and management**

|                                |         |         |         |
|--------------------------------|---------|---------|---------|
| Human resources                | 15 (5)  | 60 (14) | 53 (17) |
| Number of beds                 | 2 (1)   | 9 (2)   | 5 (2)   |
| Organization/management        | 2 (1)   | 13 (3)  | 13 (4)  |
| <b>Policies and procedures</b> |         |         |         |
| Treatment                      | 26 (9)  | 84 (19) | 92 (29) |
| Suicide risk assessment        | 92 (33) | 86 (20) | 76 (24) |
| Work process                   | 20 (7)  | 50 (11) | 51 (16) |
| Diagnostics                    | 16 (6)  | 54 (12) | 41 (13) |
| Care plan and crisis plan      | 10 (4)  | 46 (11) | 53 (17) |
| <b>Technics and equipment</b>  |         |         |         |
|                                | 5 (2)   | 13 (3)  | 15 (5)  |
| <b>Other</b>                   |         |         |         |
|                                | 2 (1)   | 11 (3)  | 0 (0)   |

Note. Cohort 1: cases reported in 2006-2007, cohort 2: cases reported in 2015, and cohort 3: cases reported in 2017-2019.

**Proposed actions for addressing deficiencies**

In a majority of the cases, the providers proposed actions for improving the healthcare services. The proportions of the action categories differed between the cohorts. In cohort 1, actions relating to “suicide risk assessment” were most common, usually involving the creation of new local guidelines regarding this issue. In cohorts 2 and 3, actions centered on education, present in more than half of the cases. Examples of educational actions were reminding staff about existing local guidelines, holding case-report discussions at staff meetings, and staging lectures regarding suicide risk assessment. For details, see Table 3.

**Table 3.** Proportions of cases for which actions were recommended in the post-suicide investigations. The data in the table comprise numbers and percentages, n (%).

|                                                     | Cohort 1 (n = 279) | Cohort 2 (n = 436) | Cohort 3 (n = 316) |
|-----------------------------------------------------|--------------------|--------------------|--------------------|
| <b>Cases with actions, total</b>                    | 133 (48)           | 346 (79)           | 283 (90)           |
| <b>Category</b>                                     |                    |                    |                    |
| <b>Communication and information</b>                |                    |                    |                    |
| Communication with peers and family                 | 12 (4)             | 51 (12)            | 27 (9)             |
| Documentation                                       | 39 (14)            | 71 (16)            | 65 (21)            |
| External communication                              | 22 (8)             | 80 (18)            | 83 (26)            |
| Internal communication                              | 15 (5)             | 55 (13)            | 46 (15)            |
| <b>Education and competence</b>                     |                    |                    |                    |
| Education and competence not specified              | 35 (13)            | 166 (38)           | 136 (43)           |
| Education and competence in suicide risk assessment | 44 (16)            | 136 (31)           | 85 (27)            |
| <b>Organization and management</b>                  |                    |                    |                    |
| Human resources                                     | 7 (3)              | 67 (15)            | 42 (13)            |
| Number of beds                                      | 1 (0)              | 4 (1)              | 1 (0)              |
| Organization/management                             | 6 (2)              | 22 (5)             | 20 (6)             |
| <b>Policies and procedures</b>                      |                    |                    |                    |

|                               |         |          |         |
|-------------------------------|---------|----------|---------|
| Treatment                     | 21 (8)  | 56 (13)  | 64 (20) |
| Suicide risk assessment       | 74 (27) | 94 (22)  | 51 (16) |
| Work process                  | 28 (10) | 119 (27) | 87 (28) |
| Diagnostics                   | 8 (3)   | 28 (6)   | 25 (8)  |
| Care plan and crisis plan     | 6 (2)   | 46 (11)  | 51 (16) |
| <b>Technics and equipment</b> | 12 (4)  | 22 (5)   | 22 (7)  |
| <b>Other</b>                  | 1 (0)   | 8 (2)    | 3 (1)   |

Note. Cohort 1 comprises of cases reported in 2006-2007, cohort 2 cases reported in 2015, and cohort 3 cases reported in 2017-2019.

### Learning and sharing

Any lessons learned and the sharing of experiences obtained from cases and investigations usually remained within the department in question. Sharing outside the department was reported in 4% (n = 17) of the cases in cohort 2, and in 7% (n = 21) of the cases in cohort 3. Sharing outside the department was not reported in any cases in cohort 1.

### Routines

Over time, proposals for actions concerning updating or developing new routines became more common in the investigations. In cohorts 2 and 3, there were significantly more cases featuring the proposed development of new routines when compared with the number of cases for which an absence of routines was identified. In all cohorts, the number of revisions exceeded the number of identified dysfunctional routines. Non-adherence to existing routines was highlighted in almost one-third of the cases in cohort 3. For details, see Table 4.

**Table 4.** Deficiencies and actions in routines, reported in the post-suicide investigations.

|                               |               | <b>Cohort 1</b><br><b>(n=279)</b> | <b>Cohort 2</b><br><b>(n=436)</b> | <b>Cohort 3</b><br><b>(n=316)</b> |
|-------------------------------|---------------|-----------------------------------|-----------------------------------|-----------------------------------|
| <b>Routines, deficiencies</b> | Non-adherence | 10 (4)                            | 44 (10)                           | 95 (30)                           |
|                               | Absent        | 38 (14)                           | 30 (7)                            | 28 (9)                            |
|                               | Dysfunctional | 1 (0)                             | 0 (0)                             | 8 (3)                             |
| <b>Routines, actions</b>      | Revision      | 24 (9)                            | 58 (13)                           | 47 (15)                           |
|                               | New           | 55 (20)                           | 94 (22)*                          | 99 (31)*                          |

Note. The data in the table comprise numbers and percentage, n (%). Cohort 1: cases reported in 2006-2007, cohort 2: cases reported in 2015, and cohort 3: cases reported in 2017-2019.

\* Significantly more cases involved the development of new routines when compared with the number of absent routines,  $p < 0.001$

### Organizational hierarchy

For both deficiencies and proposed actions, the microsystem perspective remained dominant over the 13-year period. However, cohorts 2 and 3 showed a significant increase in the proportion of deficiencies and actions at the mesosystem level compared with cohort 1. No deficiencies were found at the macrosystem level. For details, see Table 5.

Examples of deficiencies at the microsystem level were inadequacies in doctors' prescriptions or in suicide-risk assessments. Examples of actions at the microsystem level were case discussions at staff meetings, lectures, and the development of new checklists. Deficiencies at the mesosystem level

included shortcomings in cooperation between the psychiatric clinic and somatic clinic, or inadequate communication between the hospital and primary care center. Examples of actions at the mesosystem level were alterations of procedures for communication or cooperation between different healthcare providers.

**Table 5.** Respective distributions of the highest organizational hierarchy levels for the deficiencies and actions associated with the cases. Only the highest level for each case is noted. The data in the table comprise numbers and percentages, n (%).

|                                    |              | Cohort 1 | Cohort 2  | Cohort 3 |
|------------------------------------|--------------|----------|-----------|----------|
| Organizational level, deficiencies | <b>Micro</b> | 121 (90) | 157 (65)  | 179 (73) |
|                                    | <b>Meso</b>  | 13 (10)  | 83 (35)*  | 67 (27)* |
|                                    | <b>Macro</b> | 0 (0)    | 0 (0)     | 0 (0)    |
| Organizational level, actions      | <b>Micro</b> | 115 (85) | 225 (65)  | 206 (75) |
|                                    | <b>Meso</b>  | 20 (15)  | 120 (35)* | 70 (25)* |
|                                    | <b>Macro</b> | 0 (0)    | 1 (0)     | 0 (0)    |

Note. Cohort 1: cases reported in 2006-2007, cohort 2: cases reported in 2015, and cohort 3: cases reported in 2017-2019.

\* Significantly larger proportion of cases with deficiencies or actions at the mesosystem level when compared to cohort 1,  $p < 0.005$

### Decisions of the supervisory authority

In all cohorts, the majority of the reports from the healthcare providers were approved by the supervisory authority without further requirements. Immediate approval was provided for 59% (n = 164) of the reports for cohort 1, 65% (n = 284) for cohort 2, and 59% (n = 186) for cohort 3. Meanwhile, inspections of the healthcare provider occurred for 9% (n = 25) of the cases in cohort 1, 6% (n = 25) of those in cohort 2 and 4% (n = 13) of those in cohort 3. A physician employed at the supervisory authority was involved in the decision-making for 89% (n = 249) of the cases in cohort 1, in 4% (n = 17) of the cases in cohort 2, and 13% (n = 40) of the cases in cohort 3.

## DISCUSSION

This study explored changes in the outcomes of post-suicide investigations by healthcare services in cases reported as potential incidents of patient harm, adopting a 13-year perspective. Possible improvements for patient safety that could contribute to suicide-prevention were also examined in the context of these reports.

Over time the investigations generally and consistently focused on final patient contact, analyzing the immediate interface between the patient and staff from a microsystem level perspective.

The most common measures recommended for all cohorts were updating existing or developing new routines, and educational actions - potentially unsustainable, person-based. Sharing conclusions across departments was planned in only a small percentage of the cases. This similarity of investigation outcomes over the years, regardless of changes in legislation, suggests that the investigations were adapted to suit the structure of the authority report rather than specific incidents, and imply that no new service improvements or lessons are being identified.

The suicide rate in Sweden has not shown any obvious decline since the reporting of all suicide cases became mandatory,<sup>28</sup> and the healthcare-service deficiencies highlighted in these reports as being of significance continue to occur. In other words, despite several thousand investigations into healthcare

1  
2  
3 performance prior to suicides over the last few decades, aimed at identifying actions to improve  
4 healthcare for patients with suicidal tendencies, the same contributing factors remain.<sup>29</sup> This suggests  
5 that the actions taken to date have not been sufficient. A possible means of addressing this would be  
6 the systematic aggregation and analysis of trends through multiple investigations, which would help to  
7 conclusively identify recurrent deficiencies, and encouraging investigators to act as facilitators of  
8 organizational development instead of mandating single investigations.<sup>30</sup>  
9

10 Most of the reported cases in this study had their last contact with a healthcare professional within  
11 days of their deaths. Two-thirds of the cases lacked a documented report of an elevated risk of suicide  
12 in the months before the death, and this persisted across cohorts, despite the strong focus in many of  
13 the analyzed investigations on actions related to suicide-risk assessment and education. Over the years,  
14 there has been a shift from reports of an absence of local policies for suicide-risk assessment to reports  
15 of non-adherence to existing policies for suicide-risk assessment. In the studied cohorts, only 7-10% of  
16 the patients were documented as being at high risk of suicide during the last months before death. The  
17 proportion of patients receiving compulsory psychiatric treatment at the time of suicide remained  
18 constant over the years, at 5-6%. This low proportion may indicate that, in most cases, compulsory  
19 psychiatric care fulfills its purpose and serves as a protective factor for patients.  
20  
21

22 Approximately half of the suicide victims in all cohorts had a documented prior suicide attempt;  
23 learning from cases of the successful treatment of patients who have survived prior suicidal crises  
24 could thus be of importance for improving suicide prevention in healthcare. However, such learning  
25 actions are not recommended in the Swedish reporting system, which is currently based on a Safety-I  
26 model; thus possible learning opportunities are not supported unless a Safety-II perspective is  
27 supplemented.<sup>4</sup>  
28  
29

30 Cohort 3 showed a higher proportion of deficiencies in “education and competence” when compared  
31 to cohorts 1 and 2. These deficiencies were often connected to deficiencies in “human resources” and  
32 “internal communication,” suggesting difficulties in recruiting personnel with adequate competence,  
33 shortcomings in the introduction of new staff, and complications integrating locum doctors.  
34

35 Deficiencies in “external communication” and “treatment” were present in almost one-third of the  
36 cases in cohort 3. This cohort showed a younger population with some higher degree of psychiatric  
37 diagnoses, which suggests that this was a more complex group with a need for support from different  
38 care providers, requiring external collaboration and, possibly, more complex treatment interventions.  
39

40 In all cohorts, there was a pronounced focus on routines. Updating existing or developing new routines  
41 was the most common recommendation proposed in the investigations over the years. All cohorts, but  
42 most obviously cohort 3, showed a mismatch between the number of cases where an absence of  
43 routines was noted and the number of cases for which the development of new routines was  
44 recommended. Further, the number of revisions exceeded the number of identified dysfunctional  
45 routines. Non-adherence to existing routines was highlighted in almost one-third of the cases in cohort  
46 3, and the solutions seemed to focus on creating new routines instead of ensuring adherence,  
47 preconditions, and usability. Notably, reflections on why adherence to existing routines failed from a  
48 system perspective were missing in the investigations. Changes or reimplementation of routines are  
49 person-based and have weak efficacy from a systemic perspective, but require less effort than strong  
50 actions on a systemic level.<sup>31 32</sup> The same concerns were present regarding educational actions, which  
51 were highlighted in over half of the cases in cohorts 2 and 3. The dominance of person-based actions  
52 at the microsystem level is not unique for the Swedish setting. Kellogg et al obtained the same  
53 findings in a review conducted in the US,<sup>12</sup> and other studies have reported that investigators complete  
54 their analyses after identifying human error, rather than proceeding to identify system-based  
55 problems.<sup>33 34</sup> Attributing issues to human error easily leads to person-based solutions, and creates a  
56 focus on what is possible rather than what is needed.<sup>30</sup>  
57  
58  
59  
60



1  
2  
3 Suicide locations and methods were similar in all cohorts, but were reported in less than 90% of the  
4 investigations in cohort 3. This was surprising, as these cases were regarded as representing incidents  
5 of severe patient harm, and analysis of the specific circumstances concerning the suicide should be of  
6 importance in regard to evaluating preventable factors.  
7

8 The distribution of the supervisory authority's decisions remained similar over the years; most reports  
9 were approved without further arrangements. In a small number of cases, the authority made a site  
10 visit, but the frequency of such visits declined as time passed. Supervision can be a strong tool and  
11 incitement for improvement and development of healthcare services,<sup>14</sup> but the results in this study  
12 suggest that the authority did not avail of this. Mandatory reporting thus was determined to be a  
13 process of information transfer between healthcare providers and the authority, rather than a means of  
14 creating a participative improvement that enhances safety for patients with suicidal tendencies.  
15  
16

17 The overall aim of the incident-reporting system is to make healthcare safer, which presupposes  
18 learning. However, learning that extends beyond the staff involved in the incident requires  
19 information-sharing. The review of the reports in this study showed that sharing information between  
20 departments was planned in a low percentage of cases. Learning is a complex social and participative  
21 process that involves people actively reflecting on and organizing shared knowledge and practices.<sup>8</sup>  
22 Safety begins, rather than ends, with incident reports, and requires broad, in-depth, and high-quality  
23 investigations and careful planning and follow-up of the implementation of corrective actions to  
24 ensure they are sustainable over time.<sup>35</sup> To generate persistent knowledge and learning from cases,  
25 feedback should include more than a passive, brief report in a staff meeting that reminds of or notifies  
26 of the updating of a routine.  
27  
28

29 Suicide is usually the final outcome of several interacting factors over time, and only a small  
30 proportion of suicides are committed in hospitals.<sup>36 37</sup> Most suicides occur in the patient's home  
31 without any witnesses or staff; this makes suicide, as a case of patient harm, somewhat different from  
32 most other kinds of such incidents in healthcare. The requirements of the report to the authority are the  
33 same for all kinds of incidents, meaning the investigating process may be adapted to suit the standard  
34 template rather than the specific character of the incident. Analyzing the last contact with a healthcare  
35 professional from a microsystem level perspective is not sufficient to learn how healthcare can better  
36 help patients with suicidal tendencies. The investigation should integrate analysis of the suicidal  
37 process over time, including suicide-prevention tools. To advance this issue, a shift in investigations  
38 requirements and reports is needed, as well as more sophisticated infrastructures for investigation,  
39 learning, and sharing in healthcare services.  
40  
41

### 42 **Limitations and strengths**

43 All data were based on the healthcare providers' investigations and reports to the supervisory  
44 authority. The content in these reports is regulated by law; however, the quality of analysis differs and  
45 there still may have been additional shortcomings and inadequacies that were not mentioned in the  
46 reports or observed by the authority. Furthermore, there is no national taxonomy for the categorization  
47 of deficiencies and actions; a coding scheme created by the authors and used in a prior study was used.  
48 The category of "other" was used only in a few cases, suggesting that the categories in the coding  
49 scheme covered most of the reported deficiencies and actions.  
50  
51

52 The strengths of this study are that all investigations concerned the same kind of incident; suicides,  
53 and the data were population-based. Further, all data collection and categorization were conducted by  
54 only one researcher, who is a psychiatrist with experience working with patient safety issues; this  
55 ensured a high level of consistency.  
56  
57

### 58 **Conclusions**

1  
2  
3 The mandatory reporting of suicides as potential cases of patient harm was shown to be restricted to  
4 information transfer between healthcare providers and the supervisory authority, rather than fostering  
5 participative improvement of patient safety for suicidal patients.  
6

7 The similarity in outcomes across the cohorts, regardless of changes in legislation, suggests that the  
8 investigations were adapted to suit the structure of the authority's reports rather than the specific  
9 incident type, and that no new service improvements or lessons are being identified.  
10

11 To develop more sophisticated infrastructures for investigation, learning, and information-sharing, it is  
12 necessary to learn more about preconditions and complexity in the analysis of suicides and the suicidal  
13 process.  
14

15 A shift in investigations' recommendations and reports should be encouraged, to also include learning  
16 from successfully treated and resolved suicide-related crises.  
17  
18  
19

### 20 **Acknowledgements**

21 The authors are grateful to Region Jönköpings county and Futurum for funding and to Public Health  
22 Agency of Sweden for support.  
23  
24

### 25 **Authors' contributor statement**

26 EF designed the study, collected and registered the data, made the first analyses and wrote the  
27 manuscript. BAG, AR and ÅW contributed to the study design, analyses of the data and revisions of  
28 the manuscript. All authors read and approved the final manuscript.  
29  
30

### 31 **Competing interests**

32 The authors declare that they have no competing interests.  
33  
34

### 35 **Funding**

36 This study was funded by Futurum, the research center at Region Jönköping county.  
37  
38

### 39 **Data sharing statement**

40 The complete coding scheme is available by e-mailing [elin.froding@rjl.se](mailto:elin.froding@rjl.se).  
41  
42  
43  
44  
45  
46  
47  
48  
49

## 50 **REFERENCES**

- 51 1 Kohn LT CJ, Donaldson MS. To err is human: building a safer health system. Washington DC:  
52 National Academies Press 2000.
- 53 2 Leape LL. Reporting of adverse events. *N Engl J Med* 2002;347(20):1633-8. doi:  
54 10.1056/NEJMNEJMhpr011493.
- 55 3 Braithwaite J, Wears RL, Hollnagel E. Resilient health care: turning patient safety on its head.  
56 *Int J Qual Health Care* 2015;27(5):418-20. doi: 10.1093/intqhc/mzv063.
- 57 4 Hollnagel E, Wears RL, Braithwaite J. From Safety-I to Safety-II: a white paper. *Published*  
58 *simultaneously by the University of Southern Denmark, University of Florida, USA, and*  
59 *Macquarie University, Australia: The Resilient Health Care Net* 2015.  
60



- 1  
2  
3 5 Stanhope N, Crowley-Murphy M, Vincent C, *et al.* An evaluation of adverse incident reporting. *J Eval Clin Pract* 1999;5(1):5-12. doi: 10.1046/j.1365-2753.1999.00146.x.
- 4  
5 6 Vincent C, Amalberti R. Safety in healthcare is a moving target. *BMJ Qual Saf* 2015;24(9):539-40. doi: 10.1136/bmjqs-2015-004403.
- 7  
8 7 Macrae C, Vincent C. Learning from failure: the need for independent safety investigation in healthcare. *J R Soc Med* 2014;107(11):439-43. doi: 10.1177/0141076814555939
- 9  
10 8 Macrae C. The problem with incident reporting. *BMJ Qual Saf* 2016;25(2):71-5. doi: 10.1136/bmjqs-2015-004732.
- 11  
12 9 Macrae C. Remembering to learn: the overlooked role of remembrance in safety improvement. *BMJ Qual Saf* 2017;26(8):678-82. doi: 10.1136/bmjqs-2016-005547
- 13  
14 10 Wrigstad J, Bergström J, Gustafsson P. Mind the gap between recommendation and implementation—principles and lessons in the aftermath of incident investigations: a semi-quantitative and qualitative study of factors leading to the successful implementation of recommendations. *BMJ Open* 2014;4 doi: 10.1136/bmjopen-2014-005326.
- 15  
16 11 Roos af Hjelmsäter E, Ros A, Gäre BA, *et al.* Deficiencies in healthcare prior to suicide and actions to deal with them: a retrospective study of investigations after suicide in Swedish healthcare. *BMJ Open* 2019;9(12):e032290. doi: 10.1136/bmjopen-2019-032290.
- 17  
18 12 Kellogg KM, Hettinger Z, Shah M, *et al.* Our current approach to root cause analysis: is it contributing to our failure to improve patient safety? *BMJ Qual Saf* 2017;26(5):381-87. doi: 10.1136/bmjqs-2016-005991.
- 19  
20 13 Mitchell I, Schuster A, Smith K, *et al.* Patient safety incident reporting: a qualitative study of thoughts and perceptions of experts 15 years after 'To Err is Human'. *BMJ Qual Saf* 2016;25(2):92-9. doi: 10.1136/bmjqs-2015-004405.
- 21  
22 14 Leistikow I, Mulder S, Vesseur J, *et al.* Learning from incidents in healthcare: the journey, not the arrival, matters. *BMJ Qual Saf* 2017;26(3):252-56. doi: 10.1136/bmjqs-2015-004853.
- 23  
24 15 Shojania KG, Thomas EJ. Trends in adverse events over time: why are we not improving? *BMJ Qual Saf* 2013;22(4):273-77. doi: 10.1136/bmjqs-2013-001935.
- 25  
26 16 The Swedish Patient Safety Act (SFS 2010:659) [<https://www.riksdagen.se/sv/dokument-lagar/dokument/svensk-forfattningssamling/patientsakerhetslag-2010659-sfs-2010-659>]. [accessed 2 February 2019].
- 27  
28 17 World Health Organization. Suicide data 2018. Available from: [http://www.who.int/mental\\_health/prevention/suicide/suicideprevent/en/](http://www.who.int/mental_health/prevention/suicide/suicideprevent/en/) [accessed 17 October 2018].
- 29  
30 18 Luoma JB, Martin CE, Pearson JL. Contact with mental health and primary care providers before suicide: a review of the evidence. *Am J Psychiatry* 2002;159(6):909-16. doi: 10.1176/appi.ajp.159.6.909.
- 31  
32 19 Chock MM, Lin JC, Athyal VP, *et al.* Differences in health care utilization in the year before suicide death: a population-based case-control study. *Mayo Clin Proc* 2019;94(10):1983-93. doi: 10.1016/j.mayocp.2019.04.037.
- 33  
34 20 Cavanagh JT, Carson AJ, Sharpe M, *et al.* Psychological autopsy studies of suicide: a systematic review. *Psychol Med* 2003;33(3):395-405.
- 35  
36 21 Zalsman G, Hawton K, Wasserman D, *et al.* Suicide prevention strategies revisited: 10-year systematic review. *Lancet Psychiatry* 2016;3(7):646-59. doi: 10.1016/s2215-0366(16)30030-x.
- 37  
38 22 Wasserman D, Rihmer Z, Rujescu D, *et al.* The European psychiatric association (EPA) guidance on suicide treatment and prevention. *Eur Psychiatry* 2012;27(2):129-41. doi: 10.1016/j.eurpsy.2011.06.003.
- 39  
40 23 Mann JJ, Apter A, Bertolote J, *et al.* Suicide prevention strategies: a systematic review. *JAMA* 2005;294(16):2064-74. doi: 10.1001/jama.294.16.2064.
- 41  
42 24 The National Board of Health and Welfare. Socialstyrelsens föreskrifter om anmälan av vårdskador enligt lex Maria (SOSFS 2005:28)[The National Board of Health and Welfare's regulations on the reporting of severe patient harm]. Stockholm: The National Board of Health and Welfare.
- 43  
44  
45  
46  
47  
48  
49  
50  
51  
52  
53  
54  
55  
56  
57  
58  
59  
60

- 1  
2  
3 25 The National Board of Health and Welfare. Socialstyrelsens föreskrifter och allmänna råd om  
4 vårdgivares systematiska patientsäkerhetsarbete (HSLF-FS 2017:40) [The National Board of  
5 Health and Welfare's regulations and general advice on healthcare organization's systematic  
6 patient safety work]. Stockholm: The National Board of Health and Welfare.  
7  
8 26 Swedish Association of Local Authorities and Regions. Risk och händelseanalys [Risk analysis  
9 and adverse events analysis]. Stockholm: Swedish Association of Local Authorities and  
10 Regions 2015.  
11 27 Nelson EC, Batalden PB, Godfrey MM. Quality by design: a clinical microsystems approach.  
12 San Francisco: Jossey-Bass 2007.  
13 28 The National Board of Health and Welfare. Statistikdatabas för dödsorsaker [Statistical  
14 database, cause of death]: The National Board of Health and Welfare; 2020. Available from:  
15 [https://sdb.socialstyrelsen.se/ifs\\_dor/resultat.aspx](https://sdb.socialstyrelsen.se/ifs_dor/resultat.aspx) [accessed 2020-02-02].  
16  
17 29 Health and Social Care Inspectorate. [https://www.ivo.se/publicerat-material/statistik/lex-](https://www.ivo.se/publicerat-material/statistik/lex-maria-och-lex-sarah/)  
18 [maria-och-lex-sarah/](https://www.ivo.se/publicerat-material/statistik/lex-maria-och-lex-sarah/) [accessed 2020-02-05].  
19 30 Nicolini D, Waring J, Mengis J. Policy and practice in the use of root cause analysis to  
20 investigate clinical adverse events: mind the gap. *Soc Sci Med* 2011;73(2):217-25. doi:  
21 10.1016/j.socscimed.2011.05.010.  
22 31 Trbovich P, Shojania KG. Root-cause analysis: swatting at mosquitoes versus draining the  
23 swamp. *BMJ Qual Saf* 2017;26(5):350-53. doi: 10.1136/bmjqs-2016-006229.  
24 32 Cafazzo JA, St-Cyr O. From discovery to design: the evolution of human factors in healthcare.  
25 *Healthc Q* 2012;15(April (Special Issue)):24-29.  
26 33 Mills PD, Neily J, Luan D, *et al.* Actions and implementation strategies to reduce suicidal  
27 events in the Veterans Health Administration. *Jt Comm J Qual Patient Saf* 2006;32(3):130-41.  
28 34 Percarpio KB, Watts BV, Weeks WB. The effectiveness of root cause analysis: what does the  
29 literature tell us? *Jt Comm J Qual Patient Saf* 2008;34(7):391-8. doi: 10.1016/s1553-  
30 7250(08)34049-5.  
31 35 Macrae C. Close calls: managing risk and resilience in airline flight safety: Springer 2014.  
32 36 Qin P, Nordentoft M. Suicide risk in relation to psychiatric hospitalization: evidence based on  
33 longitudinal registers. *Arch Gen Psychiatry* 2005;62(4):427-32. doi:  
34 10.1001/archpsyc.62.4.427.  
35 37 Ballard ED PM, Henderson D, *et al.* Suicide in the medical setting. *Jt Comm J Qual Patient Saf*  
36 2008;34:474-81.  
37  
38  
39  
40  
41  
42  
43  
44  
45  
46  
47  
48  
49  
50  
51  
52  
53  
54  
55  
56  
57  
58  
59  
60

# BMJ Open

## Suicide as an incident of severe patient harm – a retrospective review of investigations of the healthcare provided to patients prior to their suicide

|                                 |                                                                                                                                                                                                                                                                                                                                                                                                      |
|---------------------------------|------------------------------------------------------------------------------------------------------------------------------------------------------------------------------------------------------------------------------------------------------------------------------------------------------------------------------------------------------------------------------------------------------|
| Journal:                        | <i>BMJ Open</i>                                                                                                                                                                                                                                                                                                                                                                                      |
| Manuscript ID                   | bmjopen-2020-044068.R1                                                                                                                                                                                                                                                                                                                                                                               |
| Article Type:                   | Original research                                                                                                                                                                                                                                                                                                                                                                                    |
| Date Submitted by the Author:   | 02-Feb-2021                                                                                                                                                                                                                                                                                                                                                                                          |
| Complete List of Authors:       | Fröding, Elin; Jönköping University; Region Jönköpings län<br>Gäre, Boel Andersson; Jönköping University; Region Jönköpings län, Futurum<br>Westrin, Åsa; Lund University Department of Clinical Sciences Malmo, Division of Psychiatry, Lund University ; Psychiatry Research Skåne, Office for Psychiatry and Habilitation, Region Skåne<br>Ros, Axel; Jönköping University; Region Jönköpings län |
| <b>Primary Subject Heading</b>: | Health services research                                                                                                                                                                                                                                                                                                                                                                             |
| Secondary Subject Heading:      | Mental health                                                                                                                                                                                                                                                                                                                                                                                        |
| Keywords:                       | Health & safety < HEALTH SERVICES ADMINISTRATION & MANAGEMENT, Quality in health care < HEALTH SERVICES ADMINISTRATION & MANAGEMENT, Risk management < HEALTH SERVICES ADMINISTRATION & MANAGEMENT, Suicide & self-harm < PSYCHIATRY                                                                                                                                                                 |
|                                 |                                                                                                                                                                                                                                                                                                                                                                                                      |

SCHOLARONE™  
Manuscripts

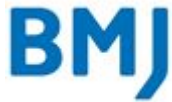

I, the Submitting Author has the right to grant and does grant on behalf of all authors of the Work (as defined in the below author licence), an exclusive licence and/or a non-exclusive licence for contributions from authors who are: i) UK Crown employees; ii) where BMJ has agreed a CC-BY licence shall apply, and/or iii) in accordance with the terms applicable for US Federal Government officers or employees acting as part of their official duties; on a worldwide, perpetual, irrevocable, royalty-free basis to BMJ Publishing Group Ltd ("BMJ") its licensees and where the relevant Journal is co-owned by BMJ to the co-owners of the Journal, to publish the Work in this journal and any other BMJ products and to exploit all rights, as set out in our [licence](#).

The Submitting Author accepts and understands that any supply made under these terms is made by BMJ to the Submitting Author unless you are acting as an employee on behalf of your employer or a postgraduate student of an affiliated institution which is paying any applicable article publishing charge ("APC") for Open Access articles. Where the Submitting Author wishes to make the Work available on an Open Access basis (and intends to pay the relevant APC), the terms of reuse of such Open Access shall be governed by a Creative Commons licence – details of these licences and which [Creative Commons](#) licence will apply to this Work are set out in our licence referred to above.

Other than as permitted in any relevant BMJ Author's Self Archiving Policies, I confirm this Work has not been accepted for publication elsewhere, is not being considered for publication elsewhere and does not duplicate material already published. I confirm all authors consent to publication of this Work and authorise the granting of this licence.

## Title page

# Suicide as an incident of severe patient harm – a retrospective review of investigations of the healthcare provided to patients prior to their suicide

### Authors

PhD. Elin Fröding, Prof. Boel Andersson Gäre, Prof. Åsa Westrin, MD. Axel Ros

### Corresponding author

Name and address: Elin Fröding, Högländssjukhuset Hus 34 pl 4, 575 81 Eksjö, Sweden

Mail and phone number: [Elin.froding@rjl.se](mailto:Elin.froding@rjl.se), +4670-3577396

### Co-authors

Prof. Boel Andersson Gäre, Jönköping University, Jönköping, Sweden and Futurum, Region Jönköping County, Sweden.

Prof. Åsa Westrin, Department of Clinical Sciences Lund, Psychiatry, Lund University, Sweden and Office for Psychiatry and Habilitation, Psychiatry Research Skåne, Region Skåne, Sweden.

MD. Axel Ros, Jönköping University, Jönköping, Sweden

### Key words

Health & safety, patient safety, risk management, quality in health care, suicide

### Word count

4193

## 1 **ABSTRACT**

### 2 **Objectives**

3 The reporting of suicides among recipients of healthcare services to the supervisory authority was  
4 mandatory in Sweden between 2006-2017. This study, adopting a 13-year perspective, aimed to  
5 explore how this mandatory reporting has influenced associated investigations conducted by the  
6 healthcare services, and also examined the lessons obtained, and whether any suicide-prevention-  
7 related improvements in terms of patient safety had followed.

### 8 **Design and settings**

9 This is a retrospective study of reports from Swedish primary and secondary healthcare after suicide to  
10 the regulatory authority in Sweden. Three cohorts of suicide cases, each from a different time period,  
11 were chosen for analysis. Complete reports of the incident investigations conducted by the healthcare  
12 providers with associated patient records and the subsequent decisions of the supervisory authority  
13 were analyzed by using a coding scheme.

### 14 **Results**

15 The investigations largely adopted a microsystem perspective, focusing on final patient contact,  
16 throughout the overall study period. Updating existing or developing new routines as well as  
17 educational actions had been increasingly proposed, while sharing conclusions across departments was  
18 rarely recommended.

### 19 **Conclusions**

20 The mandatory reporting of suicides as potential cases of patient harm was shown to be restricted to  
21 information transfer between healthcare providers and the supervisory authority, rather than fostering  
22 participative improvement of patient safety for suicidal patients.

23 The similarity in outcomes across the cohorts, regardless of changes in legislation, suggests that the  
24 investigations were adapted to suit the structure of the authority's reports rather than the specific  
25 incident type, and that no new service improvements or lessons are being identified.

26 To develop more sophisticated infrastructures for investigation, learning, and information-sharing, it is  
27 necessary to learn more about preconditions and complexity in the analysis of suicides and the suicidal  
28 process.

29 A shift in investigations' recommendations and reports should be encouraged, to also include learning  
30 from successfully treated and resolved suicide-related crises.

31

32

33

### 34 **Strengths and limitations of the study**

- 35 • To our knowledge, this is the first evaluation of the outcomes of investigations of specific  
36 types of patient harm over time, here exemplified by suicide.
- 37 • All investigations concerned the same kind of incident; suicides, and the data were population-  
38 based.

- 1 • All data were based on the healthcare providers' investigations and reports to the supervisory  
2 authority, the content in these reports is regulated by law; however, the quality of analysis  
3 differs, which was not evaluated in this study.
- 4 • All data collection and categorization were conducted by only one researcher, which rendered  
5 categorization vulnerable to bias; however this ensured a high level of consistency.

## 8 BACKGROUND

9 Deaths that occur as a result of patient harm represent a contrast to healthcare services' aim of a high  
10 level of patient safety, and such incidents can serve as powerful motivators for learning and  
11 improvement.<sup>1 2</sup> In recent decades, efforts to increase patient safety have been intensified. In  
12 particular, the reporting and investigating of cases of severe patient injury in order to identify risks and  
13 improve patient safety have become widespread safety-improvement strategies.<sup>2</sup> This reflects a safety-  
14 I perspective regarding patient safety, with focus on incidents that could have or did lead to harm for  
15 patients during healthcare, assuming that safety is achieved by eliminating what can go wrong.<sup>3</sup> This  
16 perspective assumes that adverse outcomes are caused by identifiable failures or malfunctions of  
17 specific components different from situations when things go right.<sup>3 4</sup> Similarly, root cause analysis  
18 (RCA) has become one of the most widespread tools used in the investigation of healthcare-related  
19 incidents, and presumes that such incidents can be explained by linear cause-effect chains.<sup>5 6</sup>  
20 Determining what had happened and why an incident occurred should not be the final goal of an  
21 incident investigation; the identification of gaps in service provision and means of improving relevant  
22 areas of the healthcare organization are important for improving safety.<sup>7</sup> To successfully learn from  
23 past incidents, methods to sustainably record and share relevant data are essential.<sup>8 9</sup> However, prior  
24 studies have shown that, in healthcare, post-incident investigations usually provide little learning  
25 beyond the staff and units involved.<sup>10 11</sup> Thus, the actual value of incident-reporting systems and the  
26 RCA approach in healthcare has been questioned.<sup>8 12-15</sup> With the introduction of new concepts in  
27 patient safety, such as safety-II and resilient healthcare, new approaches for improving healthcare have  
28 focused on learning from all occurrences in daily practice: to identify both those factors that support a  
29 good outcome and those that increase the risk of patient harm.<sup>3 4</sup> In the concept of safety-II, focus is on  
30 "work in practice", i. e. to better understand how clinicians provide good quality healthcare in real-  
31 time dynamic systems, including the interactions between patient care, environmental contexts, and  
32 healthcare culture. In this perspective, safety is achieved through understanding health-care staff's  
33 adaptations to varying conditions and ensuring that as much as possible goes well.

34  
35 Swedish law states that events with severe patient harm, as well as events involving risk of severe  
36 patient harm, that could have been avoided if appropriate actions had been taken by healthcare  
37 professionals, should be reported to the supervisory authority.<sup>16</sup> This report to the authority should be  
38 preceded by an investigation, conducted by the healthcare providing organization, of the healthcare  
39 services provided to the patient before the adverse event. The content of the investigation is regulated  
40 by law, and requires identification of the contributory causes of the incident and of service  
41 improvements that may prevent the reoccurrence of such an incident.

42 Suicide is a global health problem with an estimated 800 000 deaths worldwide every year.<sup>17</sup> Suicidal  
43 behaviours are heterogeneous and complex and influenced by several interacting biological, genetic,  
44 psychological, social, environmental and situational factors over time.<sup>18</sup> A large proportion of the  
45 individuals who die from suicide have contact with healthcare professionals close in time before their  
46 deaths.<sup>19 20</sup> Post-suicide studies have found that the vast majority of suicide victims have psychiatric  
47 illnesses at the time of their deaths.<sup>21 22 23</sup> This suggests that healthcare professionals play an important  
48 role in suicide prevention.<sup>24</sup> However, the nature of suicide as a process going on over time, usually  
49 occurring outside the hospitals without any witnesses nor staff around, make suicide as a case of  
50 patient harm, somewhat different from most other kinds of such incidents in healthcare. Few studies



1  
2  
3 1 have applied patient safety paradigms to advance understanding of preventing suicide<sup>25</sup> although there  
4 2 are examples of studies of health services associated with reductions in suicide rates, such as well-  
5 3 developed community outpatient services<sup>26</sup> and the implementation of 24-hour crisis services.<sup>27</sup> Kapur  
6 4 et al. suggest system-wide changes implemented across the patient care pathway could be a key  
7 5 strategy for improving patient safety in mental health care.<sup>28</sup>

9  
10 6 In an effort to understand whether failures in any area of the healthcare system have contributed to  
11 7 suicide, and in an attempt to improve suicide-prevention, the Swedish National Board of Health and  
12 8 Welfare in 2006 stipulated that all suicides that occur among patients who were receiving healthcare  
13 9 or were in contact with healthcare services within the four weeks preceding the event must be reported  
14 10 to the authority by the healthcare provider.<sup>29</sup> This remained mandatory regardless of whether the  
15 11 provider determined the suicide to be preventable. In September 2017, this regulation was updated to  
16 12 state that only suicides regarded as “severe patient harm” (i.e., preventable) must be reported to the  
17 13 supervisory authority.<sup>30</sup>

19  
20 14 Before 2011, the supervisory authority performed their own investigations of incidents, and had the  
21 15 power to reprimand the provider and responsible staff. The role of the supervisory authority changed  
22 16 in 2011, when the Swedish Patient Safety Act (2010:659)<sup>16</sup> was implemented. This new law made  
23 17 healthcare organizations responsible for patient-safety improvement, and the role of the supervisory  
24 18 authority was changed to review the investigations made by the providers, and ensure that they were  
25 19 satisfactorily fulfilled and that appropriate actions had been taken to ensure a high level of patient  
26 20 safety. In particular, the authority determines whether the healthcare provider has fulfilled their  
27 21 legislated duties, or whether there are shortcomings in the investigation, in which case the authority  
28 22 may recommend revisions or conduct a site visit to inspect the healthcare provider.

30  
31 23 To our knowledge, there are no published evaluations of the outcomes of investigations of specific  
32 24 types of patient harm over time, here exemplified by suicide.

33  
34 25 The objective of this study was to explore how mandatory reporting of suicide cases as incidents of  
35 26 potential patient harm has influenced the investigations of healthcare systems. To perform this, a 13-  
36 27 year perspective was adopted, and the lessons and possible improvements for patient safety regarding  
37 28 suicide prevention were examined.

## 39 40 30 **METHODS**

### 41 42 31 **Cases**

43  
44 32 Three cohorts of suicide cases, each from a different time period, that were reported to the supervisory  
45 33 authority were chosen for analysis. Cohort 1 comprised the cases reported to the supervisory authority  
46 34 in 2006, from the time the reporting of suicides became mandatory, to 2007 (n = 279). Cohort 2  
47 35 comprised all suicides reported in 2015, this represented a period when mandatory reporting was well-  
48 36 established among healthcare providers (n = 436). Cohort 3 comprised all reported suicides from  
49 37 September 1, 2017, which was the time the law regarding reporting was changed, to November 30,  
50 38 2019 (n = 316).

51  
52  
53 39 Complete reports of the incident investigations conducted by the healthcare providers with associated  
54 40 patient records and the subsequent decisions of the supervisory authority were obtained from the  
55 41 supervisory authority. Every individual suicide case was given a code number and the patient’s  
56 42 demographic data and treatment received in the months preceding his/her death were registered. Major  
57 43 diagnoses were documented and coded in accordance with the International Statistical Classification  
58 44 of Diseases and related Health Problems, 10<sup>th</sup> revision (i.e., ICD-10).

### 59 60 45 **Categorization of data**



1 A coding scheme was used to categorize the contributory causes of the respective suicides, the actions  
2 reported in the investigations and the decisions of the authority. The same coding scheme was used in  
3 a prior study of reported suicide cases in Sweden.<sup>11</sup> This scheme is based on the general categories  
4 used in the most common method of investigating adverse events in Swedish healthcare, which is in  
5 turn based on RCA.<sup>31</sup> To make the categorization more specific, four of the major categories were  
6 divided into additional subcategories. Every category was described and exemplified and a category of  
7 “others” was added in case none of the other categories was considered appropriate. In this present  
8 study, the contributory causes were reported as “deficiencies.” Meanwhile, an “action” was defined as  
9 any intervention performed in attempt to prevent new suicides: therefor, actions taken to prevent  
10 reported suicides (telephone calls, resuscitations) or actions aimed at informing family members or  
11 staff that a suicide had occurred were not registered as actions in this study. Separate notes were made  
12 when a deficiency or action was related to a healthcare-service routine, as well as in regard to how  
13 learning from the investigation was described. To ensure consistency, all data collection and  
14 categorization were conducted by only one researcher (EF), a psychiatrist with extensive experience in  
15 patient-safety issues.

### 16 **Organizational levels**

17 Classification of the organizational levels of deficiencies and actions was conducted to better  
18 understand where in the organizational system the identified deficiencies and actions were situated.  
19 The deficiencies and actions were coded based on a micro-meso-macro-perspective.<sup>32</sup> Microsystems  
20 were defined as the basic elements of the healthcare services provided for the patient, such as the  
21 inpatient or outpatient care unit. The mesosystem encompassed interactions between different  
22 microsystem units, such as cooperation between departments or different healthcare providers. The  
23 macrosystem involved the entire healthcare system, such as legislation, political prioritizations, and  
24 national policies on healthcare. For each case, the highest organizational level for each deficiency and  
25 action was coded.

### 26 **Supervisory authority**

27 The mandate stipulated to the authority by legislation differed between cohort 1 and cohorts 2 and 3,  
28 hence the formulation of the decisions also differed. In this paper, to facilitate comparison among  
29 these outcomes, for all cohorts only decisions categorized as “immediate approval” and “inspection”  
30 were noted, as these remained unchanged. A note was made if a physician employed by the  
31 supervisory authority was involved in the decision-making.

### 32 **Statistical analyses**

33 Frequencies for each category, organizational hierarchal level of deficiencies and actions, and  
34 decisions of the supervisory authority were analyzed per individual and aggregated per cohort.

35 Chi-square tests of independence were used to compare the number of new routines and the absence of  
36 routines within the same cohort, as well as the proportion of the organizational hierarchy of  
37 deficiencies and actions between cohorts. We considered a two-sided p value of < 0.05 to indicate  
38 statistical significance. As the pre-requisites differed between the cohorts, no further statistical  
39 analyses to compare the cohorts were judged to be possible.

40 The statistical analyses were performed using IBM SPSS Statistics 24.

### 41 **Ethical review**

42 According to the Swedish *Act Concerning the Ethical Review of Research Involving Humans*  
43 (2003:460) and an advisory opinion from the Regional Ethical Review Board (no. 2017/234), this  
44 study did not require an ethical review as it did not include human participants.

## 1 Patient and Public Involvement

2 Patients or public were not involved in this study.

## 3 RESULTS

### 4 Cases

5 Demographic data for the cases showed similarities across the cohorts, with a dominance of men and a  
6 majority of cases reported by psychiatric care. One-fourth of the cases died from suicide within one  
7 day of their last contact with a healthcare professional; half of the cases died from suicide within 2-4  
8 days of their last contact. For details, see Table 1.

**Table 1.** Characteristics of the suicide cases reported to the supervisory authority across the three cohorts. The data in the table comprise numbers and percentages, n (%).

|                                                                                                                                    |                                     | <b>Cohort 1<br/>(n = 279)</b> | <b>Cohort 2 (n<br/>= 436)</b> | <b>Cohort 3 (n =<br/>316)</b> |
|------------------------------------------------------------------------------------------------------------------------------------|-------------------------------------|-------------------------------|-------------------------------|-------------------------------|
| <b>Characteristic</b>                                                                                                              |                                     |                               |                               |                               |
| <b>Age, years</b>                                                                                                                  | Range                               | 15-95                         | 13-93                         | 11-95                         |
|                                                                                                                                    | Percentile 25                       | 36                            | 33                            | 29                            |
|                                                                                                                                    | Percentile 50                       | 50                            | 49                            | 42                            |
|                                                                                                                                    | Percentile 75                       | 64                            | 61                            | 57                            |
| <b>Gender</b>                                                                                                                      | Men                                 | 166 (60)                      | 283 (65)                      | 213 (67)                      |
|                                                                                                                                    | Women                               | 113 (40)                      | 152 (35)                      | 103 (33)                      |
| <b>Reporting<br/>healthcare<br/>service</b>                                                                                        | Psychiatric care                    | 195 (70)                      | 290 (67)                      | 233 (74)                      |
|                                                                                                                                    | Primary care                        | 47 (17)                       | 94 (22)                       | 56 (18)                       |
|                                                                                                                                    | Somatic care                        | 21 (7)                        | 33 (8)                        | 16 (5)                        |
|                                                                                                                                    | Other                               | 16 (6)                        | 18 (4)                        | 11 (3)                        |
| <b>Days between<br/>last contact with<br/>healthcare<br/>services and<br/>death</b>                                                | Range                               | 0-70                          | 0-88                          | 0-240                         |
|                                                                                                                                    | Percentile 25                       | 0                             | 1                             | 0                             |
|                                                                                                                                    | Percentile 50                       | 2                             | 4                             | 3                             |
|                                                                                                                                    | Percentile 75                       | 7                             | 10                            | 9                             |
| <b>Receiving<br/>inpatient care at<br/>time of death</b>                                                                           |                                     | 45 (16)                       | 36 (8)                        | 44 (14)                       |
| <b>Receiving<br/>compulsory<br/>psychiatric<br/>treatment at the<br/>time of death*</b>                                            |                                     | 15 (5)                        | 22 (5)                        | 20 (6)                        |
| <b>Major<br/>psychiatric<br/>diagnosis<br/>documented and<br/>coded in<br/>accordance with<br/>ICD-10 in<br/>patients' records</b> | Total (F00-F98)                     | 228 (82)                      | 371 (85)                      | 288 (91)                      |
|                                                                                                                                    | Affective<br>disorder (F30)         | 119 (43)                      | 153 (35)                      | 105 (33)                      |
|                                                                                                                                    | Anxiety disorder<br>(F40)           | 35 (13)                       | 77 (18)                       | 60 (19)                       |
|                                                                                                                                    | Substance abuse<br>(F10)            | 29 (10)                       | 51 (12)                       | 37 (12)                       |
|                                                                                                                                    | Psychosis (F20)                     | 22 (8)                        | 36 (8)                        | 30 (10)                       |
|                                                                                                                                    | Personality<br>disorder (F60)       | 12 (4)                        | 13 (3)                        | 13 (4)                        |
|                                                                                                                                    | Attention deficit<br>disorder (F90) | 1 (0)                         | 13 (3)                        | 12 (4)                        |
|                                                                                                                                    |                                     |                               |                               |                               |

|                                                                                                 |                            |          |          |          |
|-------------------------------------------------------------------------------------------------|----------------------------|----------|----------|----------|
|                                                                                                 | Autism spectrum (F84)      | 3 (1)    | 13 (3)   | 9 (3)    |
|                                                                                                 | Other                      | 7 (2)    | 15 (3)   | 22 (7)   |
| <b>Suicide-risk assessment documented in patients' records in the three months before death</b> | Absent                     | 135 (49) | 108 (25) | 119 (38) |
|                                                                                                 | Low                        | 61 (22)  | 171 (39) | 91 (29)  |
|                                                                                                 | Elevated, not acute        | 61 (22)  | 116 (27) | 75 (24)  |
|                                                                                                 | High/acute                 | 19 (7)   | 41 (9)   | 31 (10)  |
| <b>Prior suicide attempt</b>                                                                    |                            | 120 (46) | 204 (47) | 154 (49) |
| <b>Suicide method</b>                                                                           | Hanging                    | 112 (40) | 160 (37) | 128 (41) |
|                                                                                                 | Intoxication               | 42 (15)  | 110 (25) | 53 (17)  |
|                                                                                                 | Jumping                    | 21 (8)   | 13 (3)   | 19 (6)   |
|                                                                                                 | Train                      | 11 (4)   | 35 (8)   | 22 (7)   |
|                                                                                                 | Drowning                   | 15 (5)   | 28 (6)   | 13 (4)   |
|                                                                                                 | Shooting                   | 10 (4)   | 27 (6)   | 14 (4)   |
|                                                                                                 | Others                     | 13 (8)   | 12 (3)   | 16 (5)   |
|                                                                                                 | Not reported               | 51 (18)  | 50 (12)  | 51 (16)  |
|                                                                                                 | <b>Location of suicide</b> | Home     | 154 (56) | 248 (57) |
|                                                                                                 | Hospital                   | 23 (8)   | 22 (5)   | 33 (10)  |
|                                                                                                 | Other                      | 53 (19)  | 131 (30) | 83 (26)  |
|                                                                                                 | Not reported               | 44 (16)  | 35 (8)   | 39 (12)  |

*Note:* Cohort 1: cases reported in 2006-2007, cohort 2: cases reported in 2015, and cohort 3: cases reported in 2017-2019. ICD-10: International Classification of Diseases and related Health Problems, 10<sup>th</sup> revision.

\* includes both in-patient and out-patient compulsory treatment

## Deficiencies in healthcare

Cohort 3 showed the largest proportion of cases for which deficiencies in healthcare were considered to have contributed to the suicide. In this cohort, only suicide cases considered to involve severe patient harm could have been prevented if different actions had been taken by healthcare professionals were to be reported. Over time, some changes in the proportions for the categories of deficiencies were observed, but they remained centered on final patient contact with healthcare services. In cohort 1 and 2, the most common deficiencies concerned "suicide risk assessment." In general, in cohort 1 these deficiencies related to an absence of local guidelines for suicide risk assessment, and in cohort 2 to non-adherence to existing guidelines. In cohort 3, deficiencies in "treatment" and "external communication" were the most common. Examples of deficiencies in "treatment" were delayed, or a lack of, follow-up after prescription of medication, or non-adherence to treatment guidelines. Examples of deficiencies in "external information" were a lack of or insufficient information exchange between healthcare providers. For details, see Table 2.

**Table 2.** Proportions of cases with deficiencies, as reported in the post-suicide investigations of the healthcare services' actions. The data in the table comprise numbers and percentages, n (%).

|  | Cohort 1 (n = 279) | Cohort 2 (n = 436) | Cohort 3 (n = 316) |
|--|--------------------|--------------------|--------------------|
|--|--------------------|--------------------|--------------------|

|                                                     |          |          |          |
|-----------------------------------------------------|----------|----------|----------|
| <b>Cases with deficiencies, total</b>               | 136 (49) | 240 (55) | 248 (78) |
| <b>Category</b>                                     |          |          |          |
| <b>Communication and information</b>                |          |          |          |
| Communication with peers and family members         | 8 (3)    | 51 (12)  | 39 (12)  |
| Documentation                                       | 57 (20)  | 65 (15)  | 68 (22)  |
| External communication                              | 21 (8)   | 74 (17)  | 91 (29)  |
| Internal communication                              | 18 (7)   | 61 (14)  | 68 (22)  |
| <b>Education and competence</b>                     |          |          |          |
| Education and competence not specified              | 12 (4)   | 54 (11)  | 50 (16)  |
| Education and competence in suicide risk assessment | 5 (2)    | 9 (2)    | 13 (4)   |
| <b>Organization and management</b>                  |          |          |          |
| Human resources                                     | 15 (5)   | 60 (14)  | 53 (17)  |
| Number of beds                                      | 2 (1)    | 9 (2)    | 5 (2)    |
| Organization/management                             | 2 (1)    | 13 (3)   | 13 (4)   |
| <b>Policies and procedures</b>                      |          |          |          |
| Treatment                                           | 26 (9)   | 84 (19)  | 92 (29)  |
| Suicide risk assessment                             | 92 (33)  | 86 (20)  | 76 (24)  |
| Work process                                        | 20 (7)   | 50 (11)  | 51 (16)  |
| Diagnostics                                         | 16 (6)   | 54 (12)  | 41 (13)  |
| Care plan and crisis plan                           | 10 (4)   | 46 (11)  | 53 (17)  |
| <b>Technics and equipment</b>                       |          |          |          |
| Other                                               | 2 (1)    | 11 (3)   | 0 (0)    |

*Note.* Cohort 1: cases reported in 2006-2007, cohort 2: cases reported in 2015, and cohort 3: cases reported in 2017-2019.

#### Proposed actions for addressing deficiencies

In a majority of the cases, the providers proposed actions for improving the healthcare services. The proportions of the action categories differed between the cohorts. In cohort 1, actions relating to “suicide risk assessment” were most common, usually involving the creation of new local guidelines regarding this issue. In cohorts 2 and 3, actions centered on education, present in more than half of the cases. Examples of educational actions were reminding staff about existing local guidelines, holding case-report discussions at staff meetings, and staging lectures regarding suicide risk assessment. For details, see Table 3.

**Table 3.** Proportions of cases for which actions were recommended in the post-suicide investigations. The data in the table comprise numbers and percentages, n (%).

|                                      | Cohort 1 (n = 279) | Cohort 2 (n = 436) | Cohort 3 (n = 316) |
|--------------------------------------|--------------------|--------------------|--------------------|
| <b>Cases with actions, total</b>     | 133 (48)           | 346 (79)           | 283 (90)           |
| <b>Category</b>                      |                    |                    |                    |
| <b>Communication and information</b> |                    |                    |                    |
| Communication with peers and family  | 12 (4)             | 51 (12)            | 27 (9)             |

|                                                     |         |          |          |
|-----------------------------------------------------|---------|----------|----------|
| Documentation                                       | 39 (14) | 71 (16)  | 65 (21)  |
| External communication                              | 22 (8)  | 80 (18)  | 83 (26)  |
| Internal communication                              | 15 (5)  | 55 (13)  | 46 (15)  |
| <b>Education and competence</b>                     |         |          |          |
| Education and competence not specified              | 35 (13) | 166 (38) | 136 (43) |
| Education and competence in suicide risk assessment | 44 (16) | 136 (31) | 85 (27)  |
| <b>Organization and management</b>                  |         |          |          |
| Human resources                                     | 7 (3)   | 67 (15)  | 42 (13)  |
| Number of beds                                      | 1 (0)   | 4 (1)    | 1 (0)    |
| Organization/management                             | 6 (2)   | 22 (5)   | 20 (6)   |
| <b>Policies and procedures</b>                      |         |          |          |
| Treatment                                           | 21 (8)  | 56 (13)  | 64 (20)  |
| Suicide risk assessment                             | 74 (27) | 94 (22)  | 51 (16)  |
| Work process                                        | 28 (10) | 119 (27) | 87 (28)  |
| Diagnostics                                         | 8 (3)   | 28 (6)   | 25 (8)   |
| Care plan and crisis plan                           | 6 (2)   | 46 (11)  | 51 (16)  |
| <b>Technics and equipment</b>                       | 12 (4)  | 22 (5)   | 22 (7)   |
| <b>Other</b>                                        | 1 (0)   | 8 (2)    | 3 (1)    |

*Note.* Cohort 1 comprises of cases reported in 2006-2007, cohort 2 cases reported in 2015, and cohort 3 cases reported in 2017-2019.

#### Learning and sharing

Any lessons learned and the sharing of experiences obtained from cases and investigations usually remained within the department in question. Sharing outside the department was reported in 4% (n = 17) of the cases in cohort 2, and in 7% (n = 21) of the cases in cohort 3. Sharing outside the department was not reported in any cases in cohort 1.

#### Routines

Over time, proposals for actions concerning updating or developing new routines became more common in the investigations. In cohorts 2 and 3, there were significantly more cases featuring the proposed development of new routines when compared with the number of cases for which an absence of routines was identified. In all cohorts, the number of revisions exceeded the number of identified dysfunctional routines. Non-adherence to existing routines was highlighted in almost one-third of the cases in cohort 3. For details, see Table 4.

**Table 4.** Deficiencies and actions in routines, reported in the post-suicide investigations.

|                               |               | <b>Cohort 1</b><br><b>(n=279)</b> | <b>Cohort 2</b><br><b>(n=436)</b> | <b>Cohort 3</b><br><b>(n=316)</b> |
|-------------------------------|---------------|-----------------------------------|-----------------------------------|-----------------------------------|
| <b>Routines, deficiencies</b> | Non-adherence | 10 (4)                            | 44 (10)                           | 95 (30)                           |
|                               | Absent        | 38 (14)                           | 30 (7)                            | 28 (9)                            |
|                               | Dysfunctional | 1 (0)                             | 0 (0)                             | 8 (3)                             |
| <b>Routines, actions</b>      | Revision      | 24 (9)                            | 58 (13)                           | 47 (15)                           |
|                               | New           | 55 (20)                           | 94 (22)*                          | 99 (31)*                          |

1 Note. The data in the table comprise numbers and percentage, n (%). Cohort 1: cases reported in 2006-  
2 2007, cohort 2: cases reported in 2015, and cohort 3: cases reported in 2017-2019.

3 \* Significantly more cases involved the development of new routines when compared with the number of absent  
4 routines,  $p < 0.001$

### 5 **Organizational hierarchy**

6 For both deficiencies and proposed actions, the microsystem perspective remained dominant over the  
7 13-year period. However, cohorts 2 and 3 showed a significant increase in the proportion of  
8 deficiencies and actions at the mesosystem level compared with cohort 1. No deficiencies were found  
9 at the macrosystem level. For details, see Table 5.

10 Examples of deficiencies at the microsystem level were inadequacies in doctors' prescriptions or in  
11 suicide-risk assessments. Examples of actions at the microsystem level were case discussions at staff  
12 meetings, lectures, and the development of new checklists. Deficiencies at the mesosystem level  
13 included shortcomings in cooperation between the psychiatric clinic and somatic clinic, or inadequate  
14 communication between the hospital and primary care center. Examples of actions at the mesosystem  
15 level were alterations of procedures for communication or cooperation between different healthcare  
16 providers.

17  
18 **Table 5.** Respective distributions of the highest organizational hierarchy levels for the deficiencies and  
19 actions associated with the cases. Only the highest level for each case is noted. The data in the table  
20 comprise numbers and percentages, n (%).

|                                    |              | Cohort 1 | Cohort 2  | Cohort 3 |
|------------------------------------|--------------|----------|-----------|----------|
| Organizational level, deficiencies | <b>Micro</b> | 121 (90) | 157 (65)  | 179 (73) |
|                                    | <b>Meso</b>  | 13 (10)  | 83 (35)*  | 67 (27)* |
|                                    | <b>Macro</b> | 0 (0)    | 0 (0)     | 0 (0)    |
| Organizational level, actions      | <b>Micro</b> | 115 (85) | 225 (65)  | 206 (75) |
|                                    | <b>Meso</b>  | 20 (15)  | 120 (35)* | 70 (25)* |
|                                    | <b>Macro</b> | 0 (0)    | 1 (0)     | 0 (0)    |

21 Note. Cohort 1: cases reported in 2006-2007, cohort 2: cases reported in 2015, and cohort 3: cases reported in  
22 2017-2019.

23 \* Significantly larger proportion of cases with deficiencies or actions at the mesosystem level when compared to  
24 cohort 1,  $p < 0.005$

### 25 **Decisions of the supervisory authority**

26 In all cohorts, the majority of the reports from the healthcare providers were approved by the  
27 supervisory authority without further requirements. Immediate approval was provided for 59% (n =  
28 164) of the reports for cohort 1, 65% (n = 284) for cohort 2, and 59% (n = 186) for cohort 3.  
29 Meanwhile, inspections of the healthcare provider occurred for 9% (n = 25) of the cases in cohort 1,  
30 6% (n = 25) of those in cohort 2 and 4% (n = 13) of those in cohort 3. A physician employed at the  
31 supervisory authority was involved in the decision-making for 89% (n = 249) of the cases in cohort 1,  
32 in 4% (n = 17) of the cases in cohort 2, and 13% (n = 40) of the cases in cohort 3.

## 33 **DISCUSSION**

34 This study explored changes in the outcomes of post-suicide investigations by healthcare services in  
35 cases reported as potential incidents of patient harm, adopting a 13-year perspective. Possible



1  
2  
3 1 improvements for patient safety that could contribute to suicide-prevention were also examined in the  
4 2 context of these reports.

6 3 Over time the investigations generally and consistently focused on final patient contact, analyzing the  
7 4 immediate interface between the patient and staff from a microsystem level perspective.

9 5 The most common measures recommended for all cohorts were updating existing or developing new  
10 6 routines, and educational actions - potentially unsustainable, person-based. Sharing conclusions across  
11 7 departments was planned in only a small percentage of the cases. This similarity of investigation  
12 8 outcomes over the years, regardless of changes in legislation, suggests that the investigations were  
13 9 adapted to suit the structure of the authority report rather than specific incidents, and imply that no  
14 10 new service improvements or lessons are being identified.

16 11 The suicide rate in Sweden has not shown any obvious decline since the reporting of all suicide cases  
17 12 became mandatory,<sup>33</sup> and the healthcare-service deficiencies highlighted in these reports as being of  
18 13 significance continue to occur. In other words, despite several thousand investigations into healthcare  
19 14 performance prior to suicides over the last few decades, aimed at identifying actions to improve  
20 15 healthcare for patients with suicidal tendencies, the same contributing factors remain.<sup>34</sup> This suggests  
21 16 that the actions taken to date have not been sufficient. A possible means of addressing this would be  
22 17 the systematic aggregation and analysis of trends through multiple investigations, which would help to  
23 18 conclusively identify recurrent deficiencies, and encouraging investigators to act as facilitators of  
24 19 organizational development instead of mandating single investigations.<sup>35</sup> Another explanation could be  
25 20 that the current investigations fail to identify significant deficiencies, suggesting we need to develop  
26 21 more sophisticated methods for investigations of suicide.

28 22  
29 23 Most of the reported cases in this study had their last contact with a healthcare professional within  
30 24 days of their deaths. Data in this study represent a subset of the total deaths by suicide, excluding these  
31 25 not reported to the authority. However, during the last three years of mandatory reporting (2014-  
32 26 2016), 51-58% of the total suicides in Sweden were reported per year to the supervisory authority.<sup>33 34</sup>  
33 27 Two-thirds of the cases lacked a documented report of an elevated risk of suicide in the months before  
34 28 the death, and this persisted across cohorts, despite the strong focus in many of the analyzed  
35 29 investigations on actions related to suicide-risk assessment and education in this issue. Over the years,  
36 30 there has been a shift from reports of an absence of local policies for suicide-risk assessment to reports  
37 31 of non-adherence to existing policies for suicide-risk assessment. In the studied cohorts, only 7-10% of  
38 32 the patients were documented as being at high risk of suicide during the last months before death.  
39 33 Studies have shown that suicide risk instruments and risk scales do not enable clinicians to predict  
40 34 which patients will die by suicide,<sup>36 37 38</sup> raising the question of the value of these assessments.<sup>39</sup> In an  
41 35 interview study healthcare professionals describe they set forms and checklist aside to prioritise trust  
42 36 during suicide risk assessment.<sup>40</sup>

44 37  
45 38 Approximately half of the suicide victims in all cohorts had a documented prior suicide attempt, and it  
46 39 is shown that previous suicide attempt, especially repeated, imply higher risk for suicide persisting  
47 40 over decades.<sup>41</sup> Learning from cases of the successful treatment of patients who have survived prior  
48 41 suicidal crises could thus be of importance for improving suicide prevention in healthcare. However,  
49 42 such learning actions are not recommended in the Swedish reporting system, which is currently based  
50 43 on a safety-I model; thus possible learning opportunities are not supported unless a safety-II  
51 44 perspective is supplemented.<sup>3</sup>

54 45 Cohort 3 showed a higher proportion of deficiencies in “education and competence” when compared  
55 46 to cohorts 1 and 2. These deficiencies were often connected to deficiencies in “human resources” and  
56 47 “internal communication,” suggesting difficulties in recruiting personnel with adequate competence,  
57 48 shortcomings in the introduction of new staff, and complications integrating locum doctors.

1  
2  
3 1 Deficiencies in “external communication” and “treatment” were present in almost one-third of the  
4 2 cases in cohort 3. This cohort showed a younger population with some higher degree of psychiatric  
5 3 diagnoses, which suggests that this was a more complex group with a need for support from different  
6 4 care providers, requiring external collaboration and, possibly, more complex treatment interventions.

8 5 In all cohorts, there was a pronounced focus on routines. Updating existing or developing new routines  
9 6 was the most common recommendation proposed in the investigations over the years. All cohorts, but  
10 7 most obviously cohort 3, showed a mismatch between the number of cases where an absence of  
11 8 routines was noted and the number of cases for which the development of new routines was  
12 9 recommended. Further, the number of revisions exceeded the number of identified dysfunctional  
13 10 routines. Non-adherence to existing routines was highlighted in almost one-third of the cases in cohort  
14 11 3, and the solutions seemed to focus on creating new routines instead of ensuring adherence,  
15 12 preconditions, and usability. Notably, reflections on why adherence to existing routines failed from a  
16 13 system perspective were missing in the investigations. This obsession with routines reflects the current  
17 14 predominant perspectives of safety-I. In the perspective of safety-II, the variability of performance  
18 15 conditions that is the reality in healthcare, requires that how the work is performed has to be adopted  
19 16 to the current specific situation to maintain safety.<sup>3 4</sup> Thereby, no precise detailed descriptions of how  
20 17 all work should be done in all situations is possible or even desirable.

23 18 Further, changes or reimplementation of routines are person-based and have weak efficacy from a  
24 19 systemic perspective, but require less effort than strong actions on a systemic level.<sup>42 43</sup> The same  
25 20 concerns were present regarding educational actions, which were highlighted in over half of the cases  
26 21 in cohorts 2 and 3. The dominance of person-based actions at the microsystem level is not unique for  
27 22 the Swedish setting. Kellogg et al obtained the same findings in a review conducted in the US,<sup>12</sup> and  
28 23 other studies have reported that investigators complete their analyses after identifying human error,  
29 24 rather than proceeding to identify system-based problems.<sup>44 45</sup> Attributing issues to human error easily  
30 25 leads to person-based solutions, and creates a focus on what is possible rather than what is needed.<sup>35</sup>  
31 26 Recurrent widespread microsystem issues require whole-system responses at macro level to be solved.

34 27  
35 28 Suicide locations and methods were similar in all cohorts, but were reported in less than 90% of the  
36 29 investigations in cohort 3. This was surprising, as these cases were regarded as representing incidents  
37 30 of severe patient harm, and analysis of the specific circumstances concerning the suicide should be of  
38 31 importance in regard to evaluating preventable factors.

41 32 The distribution of the supervisory authority’s decisions remained similar over the years; most reports  
42 33 were approved without further arrangements. In a small number of cases, the authority made a site  
43 34 visit, but the frequency of such visits declined as time passed. Supervision can be a strong tool and  
44 35 incitement for improvement and development of healthcare services,<sup>14</sup> but the results in this study  
45 36 suggest that the authority did not avail of this. Mandatory reporting thus was determined to be a  
46 37 process of information transfer between healthcare providers and the authority, rather than a means of  
47 38 creating a participative improvement that enhances safety for patients with suicidal tendencies.

49 39 The overall aim of the incident-reporting system is to make healthcare safer, which presupposes  
50 40 learning. However, learning that extends beyond the staff involved in the incident requires  
51 41 information-sharing. The review of the reports in this study showed that sharing information between  
52 42 departments was planned in a low percentage of cases, which is in concordance with similar results  
53 43 reported in a previous Swedish study.<sup>10</sup> Learning is a complex social and participative process that  
54 44 involves people actively reflecting on and organizing shared knowledge and practices.<sup>8</sup> Safety begins,  
55 45 rather than ends, with incident reports, and requires broad, in-depth, and high-quality investigations  
56 46 and careful planning and follow-up of the implementation of corrective actions to ensure they are  
57 47 sustainable over time.<sup>46</sup> To generate persistent knowledge and learning from cases, feedback should



1  
2  
3 1 include more than a passive, brief report in a staff meeting that reminds of or notifies of the updating  
4 2 of a routine.

5  
6 3 Suicide is usually the final outcome of several interacting factors over time, and only a small  
7 4 proportion of suicides are committed in hospitals.<sup>47 48</sup> Most suicides occur in the patient's home  
8 5 without any witnesses or staff; this makes suicide, as a case of patient harm, somewhat different from  
9 6 most other kinds of such incidents in healthcare. The requirements of the report to the authority are the  
10 7 same for all kinds of incidents, meaning the investigating process may be adapted to suit the standard  
11 8 template rather than the specific character of the incident. Analyzing the last contact with a healthcare  
12 9 professional from a microsystem level perspective is not sufficient to learn how healthcare can better  
13 10 help patients with suicidal tendencies. The investigation should integrate analysis of the suicidal  
14 11 process over time, including suicide-prevention tools. To advance this issue, a shift in investigations  
15 12 requirements and reports is needed, as well as more sophisticated infrastructures for investigation,  
16 13 learning, and sharing in healthcare services. Innovation based on relevant patient safety paradigms  
17 14 combined with suicide preventions research is needed.

### 15 16 **Limitations and strengths**

17 All data were based on the healthcare providers' investigations and reports to the supervisory  
18 authority, a subset of the total deaths by suicide, excluding these not reported to the authority.  
19 The content in the reports is regulated by law; however, the quality of analysis differs and there still  
20 may have been additional shortcomings and inadequacies that were not mentioned in the reports or  
21 observed by the authority, as well as there were actions mentioned which had no relevance in the  
22 circumstances described. Furthermore, there is no national taxonomy for the categorization of  
23 deficiencies and actions; a coding scheme created by the authors and used in a prior study was used.  
24 The category of "other" was used only in a few cases, suggesting that the categories in the coding  
25 scheme covered most of the reported deficiencies and actions.

26 The strengths of this study are that all investigations concerned the same kind of incident; suicides,  
27 and the data were population-based. Further, all data collection and categorization were conducted by  
28 only one researcher, who is a psychiatrist with experience working with patient safety issues; this  
29 made the categorization vulnerable to bias, but ensured a high level of consistency.

### 30 31 **Conclusions**

32 The mandatory reporting of suicides as potential cases of patient harm was shown to be restricted to  
33 information transfer between healthcare providers and the supervisory authority, rather than fostering  
34 participative improvement of patient safety for suicidal patients.

35 The similarity in outcomes across the cohorts, regardless of changes in legislation, suggests that the  
36 investigations were adapted to suit the structure of the authority's reports rather than the specific  
37 incident type, and that no new service improvements or lessons are being identified.

38 To develop more sophisticated infrastructures for investigation, learning, and information-sharing, it is  
39 necessary to learn more about preconditions and complexity in the analysis of suicides and the suicidal  
40 process.

41 A shift in investigations' recommendations and reports should be encouraged, to also include learning  
42 from successfully treated and resolved suicide-related crises.

### 43 44 **Acknowledgements**

45 The authors are grateful to Region Jönköpings county and Futurum for funding and to Public Health  
46 Agency of Sweden for support.

### 1 **Authors' contributor statement**

2 EF designed the study, collected and registered the data, made the first analyses and wrote the  
3 manuscript. BAG, AR and ÅW contributed to the study design, analyses of the data and revisions of  
4 the manuscript. All authors read and approved the final manuscript.

### 5 **Competing interests**

6 The authors declare that they have no competing interests.

### 7 **Funding**

8 This study was funded by Futurum, the research center at Region Jönköping county.

### 9 **Data sharing statement**

10 The complete coding scheme is available by e-mailing elin.froding@rjl.se.

## 14 **REFERENCES**

- 16 1 Kohn LT CJ, Donaldson MS. To err is human: building a safer health system. Washington DC:  
17 National Academies Press 2000.
- 18 2 Leape LL. Reporting of adverse events. *N Engl J Med* 2002;347(20):1633-8. doi:  
19 10.1056/NEJMNEJMhpr011493
- 20 3 Hollnagel E, Wears RL, Braithwaite J. From Safety-I to Safety-II: a white paper. *Published*  
21 *simultaneously by the University of Southern Denmark, University of Florida, USA, and*  
22 *Macquarie University, Australia: The Resilient Health Care Net 2015*
- 23 4 Braithwaite J, Wears RL, Hollnagel E. Resilient health care: turning patient safety on its head.  
24 *Int J Qual Health Care* 2015;27(5):418-20. doi: 10.1093/intqhc/mzv063
- 25 5 Stanhope N, Crowley-Murphy M, Vincent C, *et al.* An evaluation of adverse incident  
26 reporting. *J Eval Clin Pract* 1999;5(1):5-12. doi: 10.1046/j.1365-2753.1999.00146.x
- 27 6 Vincent C, Amalberti R. Safety in healthcare is a moving target. *BMJ Qual Saf* 2015;24(9):539-  
28 40. doi: 10.1136/bmjqs-2015-004403
- 29 7 Macrae C, Vincent C. Learning from failure: the need for independent safety investigation in  
30 healthcare. *J R Soc Med* 2014;107(11):439-43. doi: 10.1177/0141076814555939
- 31 8 Macrae C. The problem with incident reporting. *BMJ Qual Saf* 2016;25(2):71-5. doi:  
32 10.1136/bmjqs-2015-004732
- 33 9 Macrae C. Remembering to learn: the overlooked role of remembrance in safety  
34 improvement. *BMJ Qual Saf* 2017;26(8):678-82. doi: 10.1136/bmjqs-2016-005547
- 35 10 Wrigstad J, Bergström J, Gustafsson P. Mind the gap between recommendation and  
36 implementation—principles and lessons in the aftermath of incident investigations: a semi-  
37 quantitative and qualitative study of factors leading to the successful implementation of  
38 recommendations. *BMJ Open* 2014;4 doi: 10.1136/bmjopen-2014-005326
- 39 11 Roos af Hjelmsäter E, Ros A, Gäre BA, *et al.* Deficiencies in healthcare prior to suicide and  
40 actions to deal with them: a retrospective study of investigations after suicide in Swedish  
41 healthcare. *BMJ Open* 2019;9(12):e032290. doi: 10.1136/bmjopen-2019-032290
- 42 12 Kellogg KM, Hettinger Z, Shah M, *et al.* Our current approach to root cause analysis: is it  
43 contributing to our failure to improve patient safety? *BMJ Qual Saf* 2017;26(5):381-87. doi:  
44 10.1136/bmjqs-2016-005991

- 1  
2  
3 1 13 Mitchell I, Schuster A, Smith K, *et al.* Patient safety incident reporting: a qualitative study of  
4 2 thoughts and perceptions of experts 15 years after 'To Err is Human'. *BMJ Qual Saf*  
5 3 2016;25(2):92-9. doi: 10.1136/bmjqs-2015-004405  
6 4 14 Leistikow I, Mulder S, Vesseur J, *et al.* Learning from incidents in healthcare: the journey, not  
7 5 the arrival, matters. *BMJ Qual Saf* 2017;26(3):252-56. doi: 10.1136/bmjqs-2015-004853  
8 6 15 Shojania KG, Thomas EJ. Trends in adverse events over time: why are we not improving? *BMJ*  
9 7 *Qual Saf* 2013;22(4):273-77. doi: 10.1136/bmjqs-2013-001935  
10 8 16 The Swedish Patient Safety Act (SFS 2010:659) [[https://www.riksdagen.se/sv/dokument-lagar/dokument/svensk-forfattningssamling/patientsakerhetslag-2010659\\_sfs-2010-659](https://www.riksdagen.se/sv/dokument-lagar/dokument/svensk-forfattningssamling/patientsakerhetslag-2010659_sfs-2010-659)].  
11 9 [accessed 2 February 2019].  
12 10  
13 11 17 World Health Organization. Suicide data 2018 [Available from:  
14 12 [http://www.who.int/mental\\_health/prevention/suicide/suicideprevent/en/](http://www.who.int/mental_health/prevention/suicide/suicideprevent/en/) [accessed 17  
15 13 October 2018].  
16 14 18 Mann J, Currier D. Stress, genetics and epigenetic effects on the neurobiology of suicidal  
17 15 behavior and depression. *European Psychiatry* 2010;25(5):268-71.  
18 16 19 Luoma JB, Martin CE, Pearson JL. Contact with mental health and primary care providers  
19 17 before suicide: a review of the evidence. *Am J Psychiatry* 2002;159(6):909-16. doi:  
20 18 10.1176/appi.ajp.159.6.909  
21 19 20 Chock MM, Lin JC, Athyal VP, *et al.* Differences in health care utilization in the year before  
22 20 suicide death: a population-based case-control study. *Mayo Clin Proc* 2019;94(10):1983-93.  
23 21 doi: 10.1016/j.mayocp.2019.04.037  
24 22 21 Cavanagh JT, Carson AJ, Sharpe M, *et al.* Psychological autopsy studies of suicide: a  
25 23 systematic review. *Psychol Med* 2003;33(3):395-405.  
26 24 22 Arsenault-Lapierre G, Kim C, Turecki G. Psychiatric diagnoses in 3275 suicides: a meta-  
27 25 analysis. *BMC psychiatry* 2004;4(1):37.  
28 26 23 Bertolote JM, Fleischmann A. Suicide and psychiatric diagnosis: a worldwide perspective.  
29 27 *World psychiatry* 2002;1(3):181.  
30 28 24 Kapur N. Health services and suicide prevention. *Journal of Mental Health* 2009;18(1):1-5.  
31 29 doi: 10.1080/09638230802370704  
32 30 25 Quinlivan L, Littlewood DL, Webb RT, *et al.* Patient safety and suicide prevention in mental  
33 31 health services: time for a new paradigm? *Journal of Mental Health* 2020;29(1):1-5. doi:  
34 32 10.1080/09638237.2020.1714013  
35 33 26 Pirkola S, Sund R, Sailas E, *et al.* Community mental-health services and suicide rate in  
36 34 Finland: a nationwide small-area analysis. *The Lancet* 2009;373(9658):147-53.  
37 35 27 While D, Bickley H, Roscoe A, *et al.* Implementation of mental health service  
38 36 recommendations in England and Wales and suicide rates, 1997–2006: a cross-sectional and  
39 37 before-and-after observational study. *The Lancet* 2012;379(9820):1005-12.  
40 38 28 Kapur N, Ibrahim S, While D, *et al.* Mental health service changes, organisational factors, and  
41 39 patient suicide in England in 1997–2012: a before-and-after study. *The Lancet Psychiatry*  
42 40 2016;3(6):526-34.  
43 41 29 Socialstyrelsens föreskrifter om anmälan av vårdskador enligt lex Maria (SOSFS 2005:28).  
44 42 Stockholm: The Swedish National Board of Health and Welfare.  
45 43 30 Socialstyrelsens föreskrifter och allmänna råd om vårdgivares systematiska  
46 44 patientsäkerhetsarbete (HSLF-FS 2017:40). Stockholm: The Swedish National Board of Health  
47 45 and Welfare.  
48 46 31 Swedish association of local authorities and regions. Risk och händelseanalys [Risk analysis  
49 47 and adverse events analysis]. Stockholm: Swedish association of local authorities and regions  
50 48 2015.  
51 49 32 Nelson EC, Batalden PB, Godfrey MM. Quality by design: a clinical microsystems approach.  
52 50 San Francisco: Jossey-Bass 2007.

- 1  
2  
3 1 33 The national board of health and welfare. Statistikdatabas för dödsorsaker [Statistical  
4 2 database, cause of death]: The national board of health and welfare; 2020 [Available from:  
5 3 [https://sdb.socialstyrelsen.se/ef\\_dor/resultat.aspx](https://sdb.socialstyrelsen.se/ef_dor/resultat.aspx) [accessed 2020-02-02.  
6 4 34 Health and Social Care Inspectorate. [https://www.ivo.se/publicerat-material/statistik/lex-  
7 5 maria-och-lex-sarah/](https://www.ivo.se/publicerat-material/statistik/lex-maria-och-lex-sarah/) [[accessed 2020-02-05.  
8 6 35 Nicolini D, Waring J, Mengis J. Policy and practice in the use of root cause analysis to  
9 7 investigate clinical adverse events: mind the gap. *Soc Sci Med* 2011;73(2):217-25. doi:  
10 8 10.1016/j.socscimed.2011.05.010  
11 9 36 Runeson B, Odeberg J, Pettersson A, *et al.* Instruments for the assessment of suicide risk: a  
12 10 systematic review evaluating the certainty of the evidence. *PLoS one* 2017;12(7):e0180292.  
13 11 37 Carter G, Milner A, McGill K, *et al.* Predicting suicidal behaviours using clinical instruments:  
14 12 systematic review and meta-analysis of positive predictive values for risk scales. *The British  
15 13 Journal of Psychiatry* 2017;210(6):387-95.  
16 14 38 Large M, Smith G, Sharma S, *et al.* Systematic review and meta-analysis of the clinical factors  
17 15 associated with the suicide of psychiatric in-patients. *Acta Psychiatrica Scandinavica  
18 16 2011;124(1):18-19.*  
19 17 39 Suicide Ncli, Health SIM. The assessment of clinical risk in mental health services: The  
20 18 University of Manchester Manchester, 2018.  
21 19 40 Berg SH, Rørtveit K, Walby FA, *et al.* Adaptive capacities for safe clinical practice for patients  
22 20 hospitalised during a suicidal crisis: a qualitative study. *BMC psychiatry* 2020;20(1):1-12.  
23 21 41 Probert-Lindström S, Berge J, Westrin Å, *et al.* Long-term risk factors for suicide in suicide  
24 22 attempters examined at a medical emergency in patient unit: results from a 32-year follow-  
25 23 up study. *BMJ open* 2020;10(10):e038794.  
26 24 42 Trbovich P, Shojania KG. Root-cause analysis: swatting at mosquitoes versus draining the  
27 25 swamp. *BMJ Qual Saf* 2017;26(5):350-53. doi: 10.1136/bmjqs-2016-006229  
28 26 43 Cafazzo JA, St-Cyr O. From discovery to design: the evolution of human factors in healthcare.  
29 27 *Healthc Q* 2012;15(April (Special Issue)):24-29.  
30 28 44 Mills PD, Neily J, Luan D, *et al.* Actions and implementation strategies to reduce suicidal  
31 29 events in the Veterans Health Administration. *Jt Comm J Qual Patient Saf* 2006;32(3):130-41.  
32 30 45 Percarpio KB, Watts BV, Weeks WB. The effectiveness of root cause analysis: what does the  
33 31 literature tell us? *Jt Comm J Qual Patient Saf* 2008;34(7):391-8. doi: 10.1016/s1553-  
34 32 7250(08)34049-5  
35 33 46 Macrae C. Close calls: managing risk and resilience in airline flight safety: Springer 2014.  
36 34 47 Qin P, Nordentoft M. Suicide risk in relation to psychiatric hospitalization: evidence based on  
37 35 longitudinal registers. *Arch Gen Psychiatry* 2005;62(4):427-32. doi:  
38 36 10.1001/archpsyc.62.4.427  
39 37 48 Ballard ED PM, Henderson D, *et al.* Suicide in the medical setting. *Jt Comm J Qual Patient Saf*  
40 38 2008;34:474-81.

46 39

47  
48  
49  
50  
51  
52  
53  
54  
55  
56  
57  
58  
59  
60

**STROBE 2007 (v4) Statement—Checklist of items that should be included in reports of *cohort studies***

| Section/Topic                | Item # | Recommendation                                                                                                                                                                       | Reported on page # |
|------------------------------|--------|--------------------------------------------------------------------------------------------------------------------------------------------------------------------------------------|--------------------|
| <b>Title and abstract</b>    | 1      | (a) Indicate the study's design with a commonly used term in the title or the abstract                                                                                               | 1                  |
|                              |        | (b) Provide in the abstract an informative and balanced summary of what was done and what was found                                                                                  | 2                  |
| <b>Introduction</b>          |        |                                                                                                                                                                                      |                    |
| Background/rationale         | 2      | Explain the scientific background and rationale for the investigation being reported                                                                                                 | 3-4                |
| Objectives                   | 3      | State specific objectives, including any prespecified hypotheses                                                                                                                     | 4                  |
| <b>Methods</b>               |        |                                                                                                                                                                                      |                    |
| Study design                 | 4      | Present key elements of study design early in the paper                                                                                                                              | 4-5                |
| Setting                      | 5      | Describe the setting, locations, and relevant dates, including periods of recruitment, exposure, follow-up, and data collection                                                      | 4                  |
| Participants                 | 6      | (a) Give the eligibility criteria, and the sources and methods of selection of participants. Describe methods of follow-up                                                           | 4                  |
|                              |        | (b) For matched studies, give matching criteria and number of exposed and unexposed                                                                                                  | Not relevant       |
| Variables                    | 7      | Clearly define all outcomes, exposures, predictors, potential confounders, and effect modifiers. Give diagnostic criteria, if applicable                                             | 4-5                |
| Data sources/<br>measurement | 8*     | For each variable of interest, give sources of data and details of methods of assessment (measurement). Describe comparability of assessment methods if there is more than one group | 4-5                |
| Bias                         | 9      | Describe any efforts to address potential sources of bias                                                                                                                            | 13                 |
| Study size                   | 10     | Explain how the study size was arrived at                                                                                                                                            | 4                  |
| Quantitative variables       | 11     | Explain how quantitative variables were handled in the analyses. If applicable, describe which groupings were chosen and why                                                         | 5                  |
| Statistical methods          | 12     | (a) Describe all statistical methods, including those used to control for confounding                                                                                                | 5                  |
|                              |        | (b) Describe any methods used to examine subgroups and interactions                                                                                                                  | 5                  |
|                              |        | (c) Explain how missing data were addressed                                                                                                                                          | Not relevant       |
|                              |        | (d) If applicable, explain how loss to follow-up was addressed                                                                                                                       | Not relevant       |
|                              |        | (e) Describe any sensitivity analyses                                                                                                                                                | Not relevant       |
| <b>Results</b>               |        |                                                                                                                                                                                      |                    |

|                          |     |                                                                                                                                                                                                                                                                                                                                                                                                               |                                      |
|--------------------------|-----|---------------------------------------------------------------------------------------------------------------------------------------------------------------------------------------------------------------------------------------------------------------------------------------------------------------------------------------------------------------------------------------------------------------|--------------------------------------|
| Participants             | 13* | (a) Report numbers of individuals at each stage of study—eg numbers potentially eligible, examined for eligibility, confirmed eligible, included in the study, completing follow-up, and analysed<br>(b) Give reasons for non-participation at each stage<br>(c) Consider use of a flow diagram                                                                                                               | 6<br>Not relevant<br>Not relevant    |
| Descriptive data         | 14* | (a) Give characteristics of study participants (eg demographic, clinical, social) and information on exposures and potential confounders<br>(b) Indicate number of participants with missing data for each variable of interest<br>(c) Summarise follow-up time (eg, average and total amount)                                                                                                                | 6-7<br>Not relevant<br>Not relevant  |
| Outcome data             | 15* | Report numbers of outcome events or summary measures over time                                                                                                                                                                                                                                                                                                                                                | 7-10                                 |
| Main results             | 16  | (a) Give unadjusted estimates and, if applicable, confounder-adjusted estimates and their precision (eg, 95% confidence interval). Make clear which confounders were adjusted for and why they were included<br>(b) Report category boundaries when continuous variables were categorized<br>(c) If relevant, consider translating estimates of relative risk into absolute risk for a meaningful time period | 7-10<br>Not relevant<br>Not relevant |
| Other analyses           | 17  | Report other analyses done—eg analyses of subgroups and interactions, and sensitivity analyses                                                                                                                                                                                                                                                                                                                | Not relevant                         |
| <b>Discussion</b>        |     |                                                                                                                                                                                                                                                                                                                                                                                                               |                                      |
| Key results              | 18  | Summarise key results with reference to study objectives                                                                                                                                                                                                                                                                                                                                                      | 13                                   |
| <b>Limitations</b>       |     |                                                                                                                                                                                                                                                                                                                                                                                                               |                                      |
| Interpretation           | 20  | Give a cautious overall interpretation of results considering objectives, limitations, multiplicity of analyses, results from similar studies, and other relevant evidence                                                                                                                                                                                                                                    | 11-13                                |
| Generalisability         | 21  | Discuss the generalisability (external validity) of the study results                                                                                                                                                                                                                                                                                                                                         | 11-13                                |
| <b>Other information</b> |     |                                                                                                                                                                                                                                                                                                                                                                                                               |                                      |
| Funding                  | 22  | Give the source of funding and the role of the funders for the present study and, if applicable, for the original study on which the present article is based                                                                                                                                                                                                                                                 | 14                                   |

\*Give information separately for cases and controls in case-control studies and, if applicable, for exposed and unexposed groups in cohort and cross-sectional studies.

**Note:** An Explanation and Elaboration article discusses each checklist item and gives methodological background and published examples of transparent reporting. The STROBE checklist is best used in conjunction with this article (freely available on the Web sites of PLoS Medicine at <http://www.plosmedicine.org/>, Annals of Internal Medicine at <http://www.annals.org/>, and Epidemiology at <http://www.epidem.com/>). Information on the STROBE Initiative is available at [www.strobe-statement.org](http://www.strobe-statement.org).



# BMJ Open

## Suicide as an incident of severe patient harm – a retrospective cohort study of investigations after suicide in Swedish healthcare in a 13-year perspective

|                                 |                                                                                                                                                                                                                                                                                                                                                                                                      |
|---------------------------------|------------------------------------------------------------------------------------------------------------------------------------------------------------------------------------------------------------------------------------------------------------------------------------------------------------------------------------------------------------------------------------------------------|
| Journal:                        | <i>BMJ Open</i>                                                                                                                                                                                                                                                                                                                                                                                      |
| Manuscript ID                   | bmjopen-2020-044068.R2                                                                                                                                                                                                                                                                                                                                                                               |
| Article Type:                   | Original research                                                                                                                                                                                                                                                                                                                                                                                    |
| Date Submitted by the Author:   | 17-Feb-2021                                                                                                                                                                                                                                                                                                                                                                                          |
| Complete List of Authors:       | Fröding, Elin; Jönköping University; Region Jönköpings län<br>Gäre, Boel Andersson; Jönköping University; Region Jönköpings län, Futurum<br>Westrin, Åsa; Lund University Department of Clinical Sciences Malmo, Division of Psychiatry, Lund University ; Psychiatry Research Skåne, Office for Psychiatry and Habilitation, Region Skåne<br>Ros, Axel; Jönköping University; Region Jönköpings län |
| <b>Primary Subject Heading</b>: | Health services research                                                                                                                                                                                                                                                                                                                                                                             |
| Secondary Subject Heading:      | Mental health                                                                                                                                                                                                                                                                                                                                                                                        |
| Keywords:                       | Health & safety < HEALTH SERVICES ADMINISTRATION & MANAGEMENT, Quality in health care < HEALTH SERVICES ADMINISTRATION & MANAGEMENT, Risk management < HEALTH SERVICES ADMINISTRATION & MANAGEMENT, Suicide & self-harm < PSYCHIATRY                                                                                                                                                                 |
|                                 |                                                                                                                                                                                                                                                                                                                                                                                                      |

SCHOLARONE™  
Manuscripts



I, the Submitting Author has the right to grant and does grant on behalf of all authors of the Work (as defined in the below author licence), an exclusive licence and/or a non-exclusive licence for contributions from authors who are: i) UK Crown employees; ii) where BMJ has agreed a CC-BY licence shall apply, and/or iii) in accordance with the terms applicable for US Federal Government officers or employees acting as part of their official duties; on a worldwide, perpetual, irrevocable, royalty-free basis to BMJ Publishing Group Ltd ("BMJ") its licensees and where the relevant Journal is co-owned by BMJ to the co-owners of the Journal, to publish the Work in this journal and any other BMJ products and to exploit all rights, as set out in our [licence](#).

The Submitting Author accepts and understands that any supply made under these terms is made by BMJ to the Submitting Author unless you are acting as an employee on behalf of your employer or a postgraduate student of an affiliated institution which is paying any applicable article publishing charge ("APC") for Open Access articles. Where the Submitting Author wishes to make the Work available on an Open Access basis (and intends to pay the relevant APC), the terms of reuse of such Open Access shall be governed by a Creative Commons licence – details of these licences and which [Creative Commons](#) licence will apply to this Work are set out in our licence referred to above.

Other than as permitted in any relevant BMJ Author's Self Archiving Policies, I confirm this Work has not been accepted for publication elsewhere, is not being considered for publication elsewhere and does not duplicate material already published. I confirm all authors consent to publication of this Work and authorise the granting of this licence.



## 1 Title page

# 2 3 **Suicide as an incident of severe patient harm – a** 4 **retrospective cohort study of investigations after** 5 **suicide in Swedish healthcare in a 13-year** 6 **perspective**

### 7 8 **Authors**

9 PhD. Elin Fröding, Prof. Boel Andersson Gäre, Prof. Åsa Westrin, MD. Axel Ros

### 10 11 **Corresponding author**

12 Name and address: Elin Fröding, Höglandssjukhuset Hus 34 pl 4, 575 81 Eksjö, Sweden

13 Mail and phone number: [Elin.froding@rjl.se](mailto:Elin.froding@rjl.se), +4670-3577396

### 14 15 **Co-authors**

16 Prof. Boel Andersson Gäre, Jönköping University, Jönköping, Sweden and Futurum, Region  
17 Jönköping County, Sweden.

18 Prof. Åsa Westrin, Department of Clinical Sciences Lund, Psychiatry, Lund University,  
19 Sweden and Office for Psychiatry and Habilitation, Psychiatry Research Skåne, Region  
20 Skåne, Sweden.

21 MD. Axel Ros, Jönköping University, Jönköping, Sweden

### 22 23 24 **Key words**

25 Health & safety, patient safety, risk management, quality in health care, suicide

### 26 27 **Word count**

28 4374

## 1 **ABSTRACT**

### 2 **Objectives**

3 To explore how mandatory reporting to the supervisory authority of suicides among recipients of  
4 healthcare services has influenced associated investigations conducted by the healthcare services, the  
5 lessons obtained, and whether any suicide-prevention-related improvements in terms of patient safety  
6 had followed.

### 7 **Design and settings**

8 Retrospective study of reports from Swedish primary and secondary healthcare to the supervisory  
9 authority after suicide.

### 10 **Participants**

11 Cohort 1: the cases reported to the supervisory authority in 2006, from the time the reporting of  
12 suicides became mandatory, to 2007 (n = 279). Cohort 2: the cases reported in 2015, a period of well-  
13 established reporting (n = 436). Cohort 3: the cases reported from September 2017, which was the  
14 time the law regarding reporting was removed, to November 2019 (n = 316).

### 15 **Primary and secondary outcome measures**

16 Demographic data and received treatment in the months preceding suicide were registered. Reported  
17 deficiencies in healthcare and actions were categorized by using a coding scheme, analyzed per  
18 individual and aggregated per cohort. Separate notes were made when a deficiency or action was  
19 related to a healthcare-service routine.

### 20 **Results**

21 The investigations largely adopted a microsystem perspective, focusing on final patient contact,  
22 throughout the overall study period. Updating existing or developing new routines as well as  
23 educational actions were increasingly proposed over time, while sharing conclusions across  
24 departments rarely was recommended.

### 25 **Conclusions**

26 The mandatory reporting of suicides as potential cases of patient harm was shown to be restricted to  
27 information transfer between healthcare providers and the supervisory authority, rather than fostering  
28 participative improvement of patient safety for suicidal patients.

29 The similarity in outcomes across the cohorts, regardless of changes in legislation, suggests that the  
30 investigations were adapted to suit the structure of the authority's reports rather than the specific  
31 incident type, and that no new service improvements or lessons are being identified.

### 32 **Strengths and limitations of the study**

- 34 • To our knowledge, this is the first evaluation of the outcomes of investigations of specific  
35 types of patient harm over time, here exemplified by suicide.
- 36 • All investigations concerned the same kind of incident; suicides, and the data were population-  
37 based.
- 38 • All data were based on the healthcare providers' investigations and reports to the supervisory  
39 authority, the content in these reports is regulated by law; however, the quality of analysis  
40 differs, which was not evaluated in this study.

- All data collection and categorization were conducted by only one researcher, which rendered categorization vulnerable to bias; however this ensured a high level of consistency.

## BACKGROUND

Deaths that occur as a result of patient harm represent a contrast to healthcare services' aim of a high level of patient safety, and such incidents can serve as powerful motivators for learning and improvement.<sup>1 2</sup> In recent decades, efforts to increase patient safety have been intensified. In particular, the reporting and investigating of cases of severe patient injury in order to identify risks and improve patient safety have become widespread safety-improvement strategies.<sup>2</sup> This reflects a safety-I perspective regarding patient safety, with focus on incidents that could have or did lead to harm for patients during healthcare, assuming that safety is achieved by eliminating what can go wrong.<sup>3</sup> This perspective assumes that adverse outcomes are caused by identifiable failures or malfunctions of specific components different from situations when things go right.<sup>3 4</sup> Similarly, root cause analysis (RCA) has become one of the most widespread tools used in the investigation of healthcare-related incidents, and presumes that such incidents can be explained by linear cause-effect chains.<sup>5 6</sup> Determining what had happened and why an incident occurred should not be the final goal of an incident investigation; the identification of gaps in service provision and means of improving relevant areas of the healthcare organization are important for improving safety.<sup>7</sup> To successfully learn from past incidents, methods to sustainably record and share relevant data are essential.<sup>8 9</sup> However, prior studies have shown that, in healthcare, post-incident investigations usually provide little learning beyond the staff and units involved.<sup>10 11</sup> Thus, the actual value of incident-reporting systems and the RCA approach in healthcare has been questioned.<sup>8 12-15</sup> With the introduction of new concepts in patient safety, such as safety-II and resilient healthcare, new approaches for improving healthcare have focused on learning from all occurrences in daily practice: to identify both those factors that support a good outcome and those that increase the risk of patient harm.<sup>3 4</sup> In the concept of safety-II, focus is on "work in practice", i. e. to better understand how clinicians provide good quality healthcare in real-time dynamic systems, including the interactions between patient care, environmental contexts, and healthcare culture. In this perspective, safety is achieved through understanding health-care staff's adaptations to varying conditions and ensuring that as much as possible goes well.

Swedish law states that events with severe patient harm, as well as events involving risk of severe patient harm, that could have been avoided if appropriate actions had been taken by healthcare professionals, should be reported to the supervisory authority.<sup>16</sup> This report to the authority should be preceded by an investigation, conducted by the healthcare providing organization, of the healthcare services provided to the patient before the adverse event. The content of the investigation is regulated by law, and requires identification of the contributory causes of the incident and of service improvements that may prevent the reoccurrence of such an incident.

Suicide is a global health problem with an estimated 800 000 deaths worldwide every year.<sup>17</sup> Suicidal behaviours are heterogeneous and complex and influenced by several interacting biological, genetic, psychological, social, environmental and situational factors over time.<sup>18</sup> A large proportion of the individuals who die from suicide have contact with healthcare professionals close in time before their deaths.<sup>19 20</sup> Post-suicide studies have found that the vast majority of suicide victims have psychiatric illnesses at the time of their deaths.<sup>21 22 23</sup> This suggests that healthcare professionals play an important role in suicide prevention.<sup>24</sup> However, the nature of suicide as a process going on over time, usually occurring outside the hospitals without any witnesses nor staff around, make suicide as a case of patient harm, somewhat different from most other kinds of such incidents in healthcare. Few studies have applied patient safety paradigms to advance understanding of preventing suicide<sup>25</sup> although there are examples of studies of health services associated with reductions in suicide rates, such as well-developed community outpatient services<sup>26</sup> and the implementation of 24-hour crisis services.<sup>27</sup> Kapur

1  
2  
3 1 et al. suggest system-wide changes implemented across the patient care pathway could be a key  
4 2 strategy for improving patient safety in mental health care.<sup>28</sup>  
5

6 3 In an effort to understand whether failures in any area of the healthcare system have contributed to  
7 4 suicide, and in an attempt to improve suicide-prevention, the Swedish National Board of Health and  
8 5 Welfare in 2006 stipulated that all suicides that occur among patients who were receiving healthcare  
9 6 or were in contact with healthcare services within the four weeks preceding the event must be reported  
10 7 to the authority by the healthcare provider.<sup>29</sup> This remained mandatory regardless of whether the  
11 8 provider determined the suicide to be preventable. In September 2017, this regulation was updated to  
12 9 state that only suicides regarded as “severe patient harm” (i.e., preventable) must be reported to the  
13 10 supervisory authority.<sup>30</sup>  
14  
15

16 11 Before 2011, the supervisory authority performed their own investigations of incidents, and had the  
17 12 power to reprimand the provider and responsible staff. The role of the supervisory authority changed  
18 13 in 2011, when the Swedish Patient Safety Act (2010:659)<sup>16</sup> was implemented. This new law made  
19 14 healthcare organizations responsible for patient-safety improvement, and the role of the supervisory  
20 15 authority was changed to review the investigations made by the providers, and ensure that they were  
21 16 satisfactorily fulfilled and that appropriate actions had been taken to ensure a high level of patient  
22 17 safety. In particular, the authority determines whether the healthcare provider has fulfilled their  
23 18 legislated duties, or whether there are shortcomings in the investigation, in which case the authority  
24 19 may recommend revisions or conduct a site visit to inspect the healthcare provider.  
25  
26

27 20 To our knowledge, there are no published evaluations of the outcomes of investigations of specific  
28 21 types of patient harm over time, here exemplified by suicide.

29  
30 22 The objective of this study was to explore how mandatory reporting of suicide cases as incidents of  
31 23 potential patient harm has influenced the investigations of healthcare systems. To perform this, a 13-  
32 24 year perspective was adopted, and the lessons and possible improvements for patient safety regarding  
33 25 suicide prevention were examined.  
34  
35

## 36 37 27 **METHODS**

38  
39 28 This study followed the guidelines of the STROBE checklist for reporting observational studies,  
40 29 available as a supplementary file.

### 41 42 30 **Cases**

43  
44 31 Three cohorts of suicide cases, each from a different time period, that were reported to the supervisory  
45 32 authority were chosen for analysis. Cohort 1 comprised the cases reported to the supervisory authority  
46 33 in 2006, from the time the reporting of suicides became mandatory, to 2007 (n = 279). Cohort 2  
47 34 comprised all suicides reported in 2015, this represented a period when mandatory reporting was well-  
48 35 established among healthcare providers (n = 436). Cohort 3 comprised all reported suicides from  
49 36 September 1, 2017, which was the time the law regarding reporting was changed, to November 30,  
50 37 2019 (n = 316).  
51

52 38 Complete reports of the incident investigations conducted by the healthcare providers with associated  
53 39 patient records and the subsequent decisions of the supervisory authority were obtained from the  
54 40 supervisory authority, granted by a contract of secrecy. Every individual suicide case was given a code  
55 41 number and the patient’s demographic data and treatment received in the months preceding his/her  
56 42 death were registered. Major diagnoses were documented and coded in accordance with the  
57 43 International Statistical Classification of Diseases and related Health Problems, 10<sup>th</sup> revision (i.e.,  
58 44 ICD-10).  
59  
60

## 1 **Categorization of data**

2 A coding scheme was used to categorize the contributory causes of the respective suicides, the actions  
3 reported in the investigations and the decisions of the authority. The same coding scheme was used in  
4 a prior study of reported suicide cases in Sweden.<sup>11</sup> This scheme is based on the general categories  
5 used in the most common method of investigating adverse events in Swedish healthcare, which is in  
6 turn based on RCA.<sup>31</sup> To make the categorization more specific, four of the major categories were  
7 divided into additional subcategories. Every category was described and exemplified and a category of  
8 “others” was added in case none of the other categories was considered appropriate. In this present  
9 study, the contributory causes were reported as “deficiencies.” Meanwhile, an “action” was defined as  
10 any intervention performed in attempt to prevent new suicides: therefor, actions taken to prevent  
11 reported suicides (telephone calls, resuscitations) or actions aimed at informing family members or  
12 staff that a suicide had occurred were not registered as actions in this study. Separate notes were made  
13 when a deficiency or action was related to a healthcare-service routine, as well as in regard to how  
14 learning from the investigation was described. To ensure consistency, all data collection and  
15 categorization were conducted by only one researcher (EF), a psychiatrist with extensive experience in  
16 patient-safety issues.

## 17 **Organizational levels**

18 Classification of the organizational levels of deficiencies and actions was conducted to better  
19 understand where in the organizational system the identified deficiencies and actions were situated.  
20 The deficiencies and actions were coded based on a micro-meso-macro-perspective.<sup>32</sup> Microsystems  
21 were defined as the basic elements of the healthcare services provided for the patient, such as the  
22 inpatient or outpatient care unit. The mesosystem encompassed interactions between different  
23 microsystem units, such as cooperation between departments or different healthcare providers. The  
24 macrosystem involved the entire healthcare system, such as legislation, political prioritizations, and  
25 national policies on healthcare. For each case, the highest organizational level for each deficiency and  
26 action was coded.

## 27 **Supervisory authority**

28 The mandate stipulated to the authority by legislation differed between cohort 1 and cohorts 2 and 3,  
29 hence the formulation of the decisions also differed. In this paper, to facilitate comparison among  
30 these outcomes, for all cohorts only decisions categorized as “immediate approval” and “inspection”  
31 were noted, as these remained unchanged. A note was made if a physician employed by the  
32 supervisory authority was involved in the decision-making.

## 33 **Statistical analyses**

34 Frequencies for each category, organizational hierarchal level of deficiencies and actions, and  
35 decisions of the supervisory authority were analyzed per individual and aggregated per cohort.

36 Chi-square tests of independence were used to compare the number of new routines and the absence of  
37 routines within the same cohort, as well as the proportion of the organizational hierarchy of  
38 deficiencies and actions between cohorts. We considered a two-sided p value of < 0.05 to indicate  
39 statistical significance. As the pre-requisites differed between the cohorts, no further statistical  
40 analyses to compare the cohorts were judged to be possible.

41 The statistical analyses were performed using IBM SPSS Statistics 24.

## 42 **Ethical review**

1 According to the Swedish *Act Concerning the Ethical Review of Research Involving Humans*  
 2 (2003:460) and an advisory opinion from the Regional Ethical Review Board (no. 2017/234), this  
 3 study did not require an ethical review as it did not include human participants.

#### 4 Patient and Public Involvement

5 Patients or public were not involved in this study.

## 6 RESULTS

### 7 Cases

8 Demographic data for the cases showed similarities across the cohorts, with a dominance of men and a  
 9 majority of cases reported by psychiatric care. One-fourth of the cases died from suicide within one  
 10 day of their last contact with a healthcare professional; half of the cases died from suicide within 2-4  
 11 days of their last contact. For details, see Table 1.

12  
 13  
 14  
 15  
 16  
 17  
 18  
 19  
 20  
 21  
 22  
 23  
 24  
 25  
 26  
 27  
 28  
 29  
 30  
 31  
 32  
 33  
 34  
 35  
 36  
 37  
 38  
 39  
 40  
 41  
 42  
 43  
 44  
 45  
 46  
 47  
 48  
 49  
 50  
 51  
 52  
 53  
 54  
 55  
 56  
 57  
 58  
 59  
 60

**Table 1.** Characteristics of the suicide cases reported to the supervisory authority across the three cohorts. The data in the table comprise numbers and percentages, n (%).

|                                                                                                                                    |                             | <b>Cohort 1<br/>(n = 279)</b> | <b>Cohort 2 (n<br/>= 436)</b> | <b>Cohort 3 (n =<br/>316)</b> |
|------------------------------------------------------------------------------------------------------------------------------------|-----------------------------|-------------------------------|-------------------------------|-------------------------------|
| <b>Characteristic</b>                                                                                                              |                             |                               |                               |                               |
| <b>Age, years</b>                                                                                                                  | Range                       | 15-95                         | 13-93                         | 11-95                         |
|                                                                                                                                    | Percentile 25               | 36                            | 33                            | 29                            |
|                                                                                                                                    | Percentile 50               | 50                            | 49                            | 42                            |
|                                                                                                                                    | Percentile 75               | 64                            | 61                            | 57                            |
| <b>Gender</b>                                                                                                                      | Men                         | 166 (60)                      | 283 (65)                      | 213 (67)                      |
|                                                                                                                                    | Women                       | 113 (40)                      | 152 (35)                      | 103 (33)                      |
| <b>Reporting<br/>healthcare<br/>service</b>                                                                                        | Psychiatric care            | 195 (70)                      | 290 (67)                      | 233 (74)                      |
|                                                                                                                                    | Primary care                | 47 (17)                       | 94 (22)                       | 56 (18)                       |
|                                                                                                                                    | Somatic care                | 21 (7)                        | 33 (8)                        | 16 (5)                        |
|                                                                                                                                    | Other                       | 16 (6)                        | 18 (4)                        | 11 (3)                        |
| <b>Days between<br/>last contact with<br/>healthcare<br/>services and<br/>death</b>                                                | Range                       | 0-70                          | 0-88                          | 0-240                         |
|                                                                                                                                    | Percentile 25               | 0                             | 1                             | 0                             |
|                                                                                                                                    | Percentile 50               | 2                             | 4                             | 3                             |
|                                                                                                                                    | Percentile 75               | 7                             | 10                            | 9                             |
| <b>Receiving<br/>inpatient care at<br/>time of death</b>                                                                           |                             | 45 (16)                       | 36 (8)                        | 44 (14)                       |
| <b>Receiving<br/>compulsory<br/>psychiatric<br/>treatment at the<br/>time of death*</b>                                            |                             | 15 (5)                        | 22 (5)                        | 20 (6)                        |
| <b>Major<br/>psychiatric<br/>diagnosis<br/>documented and<br/>coded in<br/>accordance with<br/>ICD-10 in<br/>patients' records</b> | Total (F00-F98)             | 228 (82)                      | 371 (85)                      | 288 (91)                      |
|                                                                                                                                    | Affective<br>disorder (F30) | 119 (43)                      | 153 (35)                      | 105 (33)                      |
|                                                                                                                                    | Anxiety disorder<br>(F40)   | 35 (13)                       | 77 (18)                       | 60 (19)                       |
|                                                                                                                                    | Substance abuse<br>(F10)    | 29 (10)                       | 51 (12)                       | 37 (12)                       |
|                                                                                                                                    | Psychosis (F20)             | 22 (8)                        | 36 (8)                        | 30 (10)                       |



|                                                                                                 |                                  |          |          |          |
|-------------------------------------------------------------------------------------------------|----------------------------------|----------|----------|----------|
|                                                                                                 | Personality disorder (F60)       | 12 (4)   | 13 (3)   | 13 (4)   |
|                                                                                                 | Attention deficit disorder (F90) | 1 (0)    | 13 (3)   | 12 (4)   |
|                                                                                                 | Autism spectrum (F84)            | 3 (1)    | 13 (3)   | 9 (3)    |
|                                                                                                 | Other                            | 7 (2)    | 15 (3)   | 22 (7)   |
| <b>Suicide-risk assessment documented in patients' records in the three months before death</b> | Absent                           | 135 (49) | 108 (25) | 119 (38) |
|                                                                                                 | Low                              | 61 (22)  | 171 (39) | 91 (29)  |
|                                                                                                 | Elevated, not acute              | 61 (22)  | 116 (27) | 75 (24)  |
|                                                                                                 | High/acute                       | 19 (7)   | 41 (9)   | 31 (10)  |
| <b>Prior suicide attempt</b>                                                                    |                                  | 120 (46) | 204 (47) | 154 (49) |
| <b>Suicide method</b>                                                                           | Hanging                          | 112 (40) | 160 (37) | 128 (41) |
|                                                                                                 | Intoxication                     | 42 (15)  | 110 (25) | 53 (17)  |
|                                                                                                 | Jumping                          | 21 (8)   | 13 (3)   | 19 (6)   |
|                                                                                                 | Train                            | 11 (4)   | 35 (8)   | 22 (7)   |
|                                                                                                 | Drowning                         | 15 (5)   | 28 (6)   | 13 (4)   |
|                                                                                                 | Shooting                         | 10 (4)   | 27 (6)   | 14 (4)   |
|                                                                                                 | Others                           | 13 (8)   | 12 (3)   | 16 (5)   |
|                                                                                                 | Not reported                     | 51 (18)  | 50 (12)  | 51 (16)  |
|                                                                                                 |                                  |          |          |          |
| <b>Location of suicide</b>                                                                      | Home                             | 154 (56) | 248 (57) | 161 (51) |
|                                                                                                 | Hospital                         | 23 (8)   | 22 (5)   | 33 (10)  |
|                                                                                                 | Other                            | 53 (19)  | 131 (30) | 83 (26)  |
|                                                                                                 | Not reported                     | 44 (16)  | 35 (8)   | 39 (12)  |

*Note:* Cohort 1: cases reported in 2006-2007, cohort 2: cases reported in 2015, and cohort 3: cases reported in 2017-2019. ICD-10: International Classification of Diseases and related Health Problems, 10<sup>th</sup> revision.

\* includes both in-patient and out-patient compulsory treatment

## Deficiencies in healthcare

Cohort 3 showed the largest proportion of cases for which deficiencies in healthcare were considered to have contributed to the suicide. In this cohort, only suicide cases considered to involve severe patient harm could have been prevented if different actions had been taken by healthcare professionals were to be reported. Over time, some changes in the proportions for the categories of deficiencies were observed, but they remained centered on final patient contact with healthcare services. In cohort 1 and 2, the most common deficiencies concerned “suicide risk assessment.” In general, in cohort 1 these deficiencies related to an absence of local guidelines for suicide risk assessment, and in cohort 2 to non-adherence to existing guidelines. In cohort 3, deficiencies in “treatment” and “external communication” were the most common. Examples of deficiencies in “treatment” were delayed, or a lack of, follow-up after prescription of medication, or non-adherence to treatment guidelines. Examples of deficiencies in “external information” were a lack of or insufficient information exchange between healthcare providers. For details, see Table 2.

**Table 2.** Proportions of cases with deficiencies, as reported in the post-suicide investigations of the healthcare services' actions. The data in the table comprise numbers and percentages, n (%).

|                                                     | Cohort 1 (n = 279) | Cohort 2 (n = 436) | Cohort 3 (n = 316) |
|-----------------------------------------------------|--------------------|--------------------|--------------------|
| <b>Cases with deficiencies, total</b>               | 136 (49)           | 240 (55)           | 248 (78)           |
| <b>Category</b>                                     |                    |                    |                    |
| <b>Communication and information</b>                |                    |                    |                    |
| Communication with peers and family members         | 8 (3)              | 51 (12)            | 39 (12)            |
| Documentation                                       | 57 (20)            | 65 (15)            | 68 (22)            |
| External communication                              | 21 (8)             | 74 (17)            | 91 (29)            |
| Internal communication                              | 18 (7)             | 61 (14)            | 68 (22)            |
| <b>Education and competence</b>                     |                    |                    |                    |
| Education and competence not specified              | 12 (4)             | 54 (11)            | 50 (16)            |
| Education and competence in suicide risk assessment | 5 (2)              | 9 (2)              | 13 (4)             |
| <b>Organization and management</b>                  |                    |                    |                    |
| Human resources                                     | 15 (5)             | 60 (14)            | 53 (17)            |
| Number of beds                                      | 2 (1)              | 9 (2)              | 5 (2)              |
| Organization/management                             | 2 (1)              | 13 (3)             | 13 (4)             |
| <b>Policies and procedures</b>                      |                    |                    |                    |
| Treatment                                           | 26 (9)             | 84 (19)            | 92 (29)            |
| Suicide risk assessment                             | 92 (33)            | 86 (20)            | 76 (24)            |
| Work process                                        | 20 (7)             | 50 (11)            | 51 (16)            |
| Diagnostics                                         | 16 (6)             | 54 (12)            | 41 (13)            |
| Care plan and crisis plan                           | 10 (4)             | 46 (11)            | 53 (17)            |
| <b>Technics and equipment</b>                       | 5 (2)              | 13 (3)             | 15 (5)             |
| <b>Other</b>                                        | 2 (1)              | 11 (3)             | 0 (0)              |

*Note.* Cohort 1: cases reported in 2006-2007, cohort 2: cases reported in 2015, and cohort 3: cases reported in 2017-2019.

#### Proposed actions for addressing deficiencies

In a majority of the cases, the providers proposed actions for improving the healthcare services. The proportions of the action categories differed between the cohorts. In cohort 1, actions relating to "suicide risk assessment" were most common, usually involving the creation of new local guidelines regarding this issue. In cohorts 2 and 3, actions centered on education, present in more than half of the cases. Examples of educational actions were reminding staff about existing local guidelines, holding case-report discussions at staff meetings, and staging lectures regarding suicide risk assessment. For details, see Table 3.

**Table 3.** Proportions of cases for which actions were recommended in the post-suicide investigations. The data in the table comprise numbers and percentages, n (%).

|  | Cohort 1 (n = 279) | Cohort 2 (n = 436) | Cohort 3 (n = 316) |
|--|--------------------|--------------------|--------------------|
|--|--------------------|--------------------|--------------------|

|                                                     |          |          |          |
|-----------------------------------------------------|----------|----------|----------|
| <b>Cases with actions, total</b>                    | 133 (48) | 346 (79) | 283 (90) |
| <b>Category</b>                                     |          |          |          |
| <b>Communication and information</b>                |          |          |          |
| Communication with peers and family                 | 12 (4)   | 51 (12)  | 27 (9)   |
| Documentation                                       | 39 (14)  | 71 (16)  | 65 (21)  |
| External communication                              | 22 (8)   | 80 (18)  | 83 (26)  |
| Internal communication                              | 15 (5)   | 55 (13)  | 46 (15)  |
| <b>Education and competence</b>                     |          |          |          |
| Education and competence not specified              | 35 (13)  | 166 (38) | 136 (43) |
| Education and competence in suicide risk assessment | 44 (16)  | 136 (31) | 85 (27)  |
| <b>Organization and management</b>                  |          |          |          |
| Human resources                                     | 7 (3)    | 67 (15)  | 42 (13)  |
| Number of beds                                      | 1 (0)    | 4 (1)    | 1 (0)    |
| Organization/management                             | 6 (2)    | 22 (5)   | 20 (6)   |
| <b>Policies and procedures</b>                      |          |          |          |
| Treatment                                           | 21 (8)   | 56 (13)  | 64 (20)  |
| Suicide risk assessment                             | 74 (27)  | 94 (22)  | 51 (16)  |
| Work process                                        | 28 (10)  | 119 (27) | 87 (28)  |
| Diagnostics                                         | 8 (3)    | 28 (6)   | 25 (8)   |
| Care plan and crisis plan                           | 6 (2)    | 46 (11)  | 51 (16)  |
| <b>Technics and equipment</b>                       | 12 (4)   | 22 (5)   | 22 (7)   |
| <b>Other</b>                                        | 1 (0)    | 8 (2)    | 3 (1)    |

*Note.* Cohort 1 comprises of cases reported in 2006-2007, cohort 2 cases reported in 2015, and cohort 3 cases reported in 2017-2019.

#### Learning and sharing

Any lessons learned and the sharing of experiences obtained from cases and investigations usually remained within the department in question. Sharing outside the department was reported in 4% (n = 17) of the cases in cohort 2, and in 7% (n = 21) of the cases in cohort 3. Sharing outside the department was not reported in any cases in cohort 1.

#### Routines

Over time, proposals for actions concerning updating or developing new routines became more common in the investigations. In cohorts 2 and 3, there were significantly more cases featuring the proposed development of new routines when compared with the number of cases for which an absence of routines was identified. In all cohorts, the number of revisions exceeded the number of identified dysfunctional routines. Non-adherence to existing routines was highlighted in almost one-third of the cases in cohort 3. For details, see Table 4.

**Table 4.** Deficiencies and actions in routines, reported in the post-suicide investigations.

|                               |               | <b>Cohort 1</b><br><b>(n=279)</b> | <b>Cohort 2</b><br><b>(n=436)</b> | <b>Cohort 3</b><br><b>(n=316)</b> |
|-------------------------------|---------------|-----------------------------------|-----------------------------------|-----------------------------------|
| <b>Routines, deficiencies</b> | Non-adherence | 10 (4)                            | 44 (10)                           | 95 (30)                           |

|                          |               |         |          |          |
|--------------------------|---------------|---------|----------|----------|
|                          | Absent        | 38 (14) | 30 (7)   | 28 (9)   |
|                          | Dysfunctional | 1 (0)   | 0 (0)    | 8 (3)    |
| <b>Routines, actions</b> | Revision      | 24 (9)  | 58 (13)  | 47 (15)  |
|                          | New           | 55 (20) | 94 (22)* | 99 (31)* |

Note. The data in the table comprise numbers and percentage, n (%). Cohort 1: cases reported in 2006-2007, cohort 2: cases reported in 2015, and cohort 3: cases reported in 2017-2019.

\* Significantly more cases involved the development of new routines when compared with the number of absent routines,  $p < 0.001$

### Organizational hierarchy

For both deficiencies and proposed actions, the microsystem perspective remained dominant over the 13-year period. However, cohorts 2 and 3 showed a significant increase in the proportion of deficiencies and actions at the mesosystem level compared with cohort 1. No deficiencies were found at the macrosystem level. For details, see Table 5.

Examples of deficiencies at the microsystem level were inadequacies in doctors' prescriptions or in suicide-risk assessments. Examples of actions at the microsystem level were case discussions at staff meetings, lectures, and the development of new checklists. Deficiencies at the mesosystem level included shortcomings in cooperation between the psychiatric clinic and somatic clinic, or inadequate communication between the hospital and primary care center. Examples of actions at the mesosystem level were alterations of procedures for communication or cooperation between different healthcare providers.

**Table 5.** Respective distributions of the highest organizational hierarchy levels for the deficiencies and actions associated with the cases. Only the highest level for each case is noted. The data in the table comprise numbers and percentages, n (%).

|                                    |              | Cohort 1 | Cohort 2  | Cohort 3 |
|------------------------------------|--------------|----------|-----------|----------|
| Organizational level, deficiencies | <b>Micro</b> | 121 (90) | 157 (65)  | 179 (73) |
|                                    | <b>Meso</b>  | 13 (10)  | 83 (35)*  | 67 (27)* |
|                                    | <b>Macro</b> | 0 (0)    | 0 (0)     | 0 (0)    |
| Organizational level, actions      | <b>Micro</b> | 115 (85) | 225 (65)  | 206 (75) |
|                                    | <b>Meso</b>  | 20 (15)  | 120 (35)* | 70 (25)* |
|                                    | <b>Macro</b> | 0 (0)    | 1 (0)     | 0 (0)    |

Note. Cohort 1: cases reported in 2006-2007, cohort 2: cases reported in 2015, and cohort 3: cases reported in 2017-2019.

\* Significantly larger proportion of cases with deficiencies or actions at the mesosystem level when compared to cohort 1,  $p < 0.005$

### Decisions of the supervisory authority

In all cohorts, the majority of the reports from the healthcare providers were approved by the supervisory authority without further requirements. Immediate approval was provided for 59% (n = 164) of the reports for cohort 1, 65% (n = 284) for cohort 2, and 59% (n = 186) for cohort 3. Meanwhile, inspections of the healthcare provider occurred for 9% (n = 25) of the cases in cohort 1, 6% (n = 25) of those in cohort 2 and 4% (n = 13) of those in cohort 3. A physician employed at the supervisory authority was involved in the decision-making for 89% (n = 249) of the cases in cohort 1, in 4% (n = 17) of the cases in cohort 2, and 13% (n = 40) of the cases in cohort 3.

## 1 DISCUSSION

2 This study explored changes in the outcomes of post-suicide investigations by healthcare services in  
3 cases reported as potential incidents of patient harm, adopting a 13-year perspective. Possible  
4 improvements for patient safety that could contribute to suicide-prevention were also examined in the  
5 context of these reports.

6 Over time the investigations generally and consistently focused on final patient contact, analyzing the  
7 immediate interface between the patient and staff from a microsystem level perspective.

8 The most common measures recommended for all cohorts were updating existing or developing new  
9 routines, and educational actions - potentially unsustainable, person-based. Sharing conclusions across  
10 departments was planned in only a small percentage of the cases. This similarity of investigation  
11 outcomes over the years, regardless of changes in legislation, suggests that the investigations were  
12 adapted to suit the structure of the authority report rather than specific incidents, and imply that no  
13 new service improvements or lessons are being identified.

14 The suicide rate in Sweden has not shown any obvious decline since the reporting of all suicide cases  
15 became mandatory,<sup>33</sup> and the healthcare-service deficiencies highlighted in these reports as being of  
16 significance continue to occur. In other words, despite several thousand investigations into healthcare  
17 performance prior to suicides over the last few decades, aimed at identifying actions to improve  
18 healthcare for patients with suicidal tendencies, the same contributing factors remain.<sup>34</sup> This suggests  
19 that the actions taken to date have not been sufficient. A possible means of addressing this would be  
20 the systematic aggregation and analysis of trends through multiple investigations, which would help to  
21 conclusively identify recurrent deficiencies, and encouraging investigators to act as facilitators of  
22 organizational development instead of mandating single investigations.<sup>35</sup> Another explanation could be  
23 that the current investigations fail to identify significant deficiencies, suggesting we need to develop  
24 more sophisticated methods for investigations of suicide.

25 Most of the reported cases in this study had their last contact with a healthcare professional within  
26 days of their deaths. Data in this study represent a subset of the total deaths by suicide, excluding these  
27 not reported to the authority. However, during the last three years of mandatory reporting (2014-  
28 2016), 51-58% of the total suicides in Sweden were reported per year to the supervisory authority.<sup>33 34</sup>  
29 Two-thirds of the cases lacked a documented report of an elevated risk of suicide in the months before  
30 the death, and this persisted across cohorts, despite the strong focus in many of the analyzed  
31 investigations on actions related to suicide-risk assessment and education in this issue. Over the years,  
32 there has been a shift from reports of an absence of local policies for suicide-risk assessment to reports  
33 of non-adherence to existing policies for suicide-risk assessment. In the studied cohorts, only 7-10% of  
34 the patients were documented as being at high risk of suicide during the last months before death.  
35 Studies have shown that suicide risk instruments and risk scales do not enable clinicians to predict  
36 which patients will die by suicide,<sup>36 37 38</sup> raising the question of the value of these assessments.<sup>39</sup> In an  
37 interview study healthcare professionals describe they set forms and checklist aside to prioritise trust  
38 during suicide risk assessment.<sup>40</sup>

39 Approximately half of the suicide victims in all cohorts had a documented prior suicide attempt, and it  
40 is shown that previous suicide attempt, especially repeated, imply higher risk for suicide persisting  
41 over decades.<sup>41</sup> Learning from cases of the successful treatment of patients who have survived prior  
42 suicidal crises could thus be of importance for improving suicide prevention in healthcare. However,  
43 such learning actions are not recommended in the Swedish reporting system, which is currently based  
44 on a safety-I model; thus possible learning opportunities are not supported unless a safety-II  
45 perspective is supplemented.<sup>3</sup>

46 Cohort 3 showed a higher proportion of deficiencies in “education and competence” when compared  
47 to cohorts 1 and 2. These deficiencies were often connected to deficiencies in “human resources” and



1  
2  
3 1 “internal communication,” suggesting difficulties in recruiting personnel with adequate competence,  
4 2 shortcomings in the introduction of new staff, and complications integrating locum doctors.

5  
6 3 Deficiencies in “external communication” and “treatment” were present in almost one-third of the  
7 4 cases in cohort 3. This cohort showed a younger population with some higher degree of psychiatric  
8 5 diagnoses, which suggests that this was a more complex group with a need for support from different  
9 6 care providers, requiring external collaboration and, possibly, more complex treatment interventions.

10  
11 7 In all cohorts, there was a pronounced focus on routines. Updating existing or developing new routines  
12 8 was the most common recommendation proposed in the investigations over the years. All cohorts, but  
13 9 most obviously cohort 3, showed a mismatch between the number of cases where an absence of  
14 10 routines was noted and the number of cases for which the development of new routines was  
15 11 recommended. Further, the number of revisions exceeded the number of identified dysfunctional  
16 12 routines. Non-adherence to existing routines was highlighted in almost one-third of the cases in cohort  
17 13 3, and the solutions seemed to focus on creating new routines instead of ensuring adherence,  
18 14 preconditions, and usability. Notably, reflections on why adherence to existing routines failed from a  
19 15 system perspective were missing in the investigations. This obsession with routines reflects the current  
20 16 predominant perspectives of safety-I. In the perspective of safety-II, the variability of performance  
21 17 conditions that is the reality in healthcare, requires that how the work is performed has to be adopted  
22 18 to the current specific situation to maintain safety.<sup>3 4</sup> Thereby, no precise detailed descriptions of how  
23 19 all work should be done in all situations is possible or even desirable.

24  
25  
26  
27 20 Further, changes or reimplementation of routines are person-based and have weak efficacy from a  
28 21 systemic perspective, but require less effort than strong actions on a systemic level.<sup>42 43</sup> The same  
29 22 concerns were present regarding educational actions, which were highlighted in over half of the cases  
30 23 in cohorts 2 and 3. The dominance of person-based actions at the microsystem level is not unique for  
31 24 the Swedish setting. Kellogg et al obtained the same findings in a review conducted in the US,<sup>12</sup> and  
32 25 other studies have reported that investigators complete their analyses after identifying human error,  
33 26 rather than proceeding to identify system-based problems.<sup>44 45</sup> Attributing issues to human error easily  
34 27 leads to person-based solutions, and creates a focus on what is possible rather than what is needed.<sup>35</sup>  
35 28 Recurrent widespread microsystem issues require whole-system responses at macro level to be solved.

36  
37  
38  
39 30 Suicide locations and methods were similar in all cohorts, but were reported in less than 90% of the  
40 31 investigations in cohort 3. This was surprising, as these cases were regarded as representing incidents  
41 32 of severe patient harm, and analysis of the specific circumstances concerning the suicide should be of  
42 33 importance in regard to evaluating preventable factors.

43  
44 34 The distribution of the supervisory authority’s decisions remained similar over the years; most reports  
45 35 were approved without further arrangements. In a small number of cases, the authority made a site  
46 36 visit, but the frequency of such visits declined as time passed. Supervision can be a strong tool and  
47 37 incitement for improvement and development of healthcare services,<sup>14</sup> but the results in this study  
48 38 suggest that the authority did not avail of this. Mandatory reporting thus was determined to be a  
49 39 process of information transfer between healthcare providers and the authority, rather than a means of  
50 40 creating a participative improvement that enhances safety for patients with suicidal tendencies.

51  
52  
53 41 The overall aim of the incident-reporting system is to make healthcare safer, which presupposes  
54 42 learning. However, learning that extends beyond the staff involved in the incident requires  
55 43 information-sharing. The review of the reports in this study showed that sharing information between  
56 44 departments was planned in a low percentage of cases, which is in concordance with similar results  
57 45 reported in a previous Swedish study.<sup>10</sup> Learning is a complex social and participative process that  
58 46 involves people actively reflecting on and organizing shared knowledge and practices.<sup>8</sup> Safety begins,  
59 47 rather than ends, with incident reports, and requires broad, in-depth, and high-quality investigations



1 and careful planning and follow-up of the implementation of corrective actions to ensure they are  
2 sustainable over time.<sup>46</sup> To generate persistent knowledge and learning from cases, feedback should  
3 include more than a passive, brief report in a staff meeting that reminds of or notifies of the updating  
4 of a routine.

5 Suicide is usually the final outcome of several interacting factors over time, and only a small  
6 proportion of suicides are committed in hospitals.<sup>47,48</sup> Most suicides occur in the patient's home  
7 without any witnesses or staff; this makes suicide, as a case of patient harm, somewhat different from  
8 most other kinds of such incidents in healthcare. The requirements of the report to the authority are the  
9 same for all kinds of incidents, meaning the investigating process may be adapted to suit the standard  
10 template rather than the specific character of the incident. Analyzing the last contact with a healthcare  
11 professional from a microsystem level perspective is not sufficient to learn how healthcare can better  
12 help patients with suicidal tendencies. The investigation should integrate analysis of the suicidal  
13 process over time, including suicide-prevention tools. To advance this issue, a shift in investigations  
14 requirements and reports is needed, as well as more sophisticated infrastructures for investigation,  
15 learning, and sharing in healthcare services. Innovation based on relevant patient safety paradigms  
16 combined with suicide preventions research is needed.

### 17 18 **Limitations and strengths**

19 All data were based on the healthcare providers' investigations and reports to the supervisory  
20 authority, a subset of the total deaths by suicide, excluding these not reported to the authority.  
21 The content in the reports is regulated by law; however, the quality of analysis differs and there still  
22 may have been additional shortcomings and inadequacies that were not mentioned in the reports or  
23 observed by the authority, as well as there were actions mentioned which had no relevance in the  
24 circumstances described. Furthermore, there is no national taxonomy for the categorization of  
25 deficiencies and actions; a coding scheme created by the authors and used in a prior study was used.  
26 The category of "other" was used only in a few cases, suggesting that the categories in the coding  
27 scheme covered most of the reported deficiencies and actions.

28 The strengths of this study are that all investigations concerned the same kind of incident; suicides,  
29 and the data were population-based. Further, all data collection and categorization were conducted by  
30 only one researcher, who is a psychiatrist with experience working with patient safety issues; this  
31 made the categorization vulnerable to bias, but ensured a high level of consistency.

### 32 33 **Conclusions**

34 The mandatory reporting of suicides as potential cases of patient harm was shown to be restricted to  
35 information transfer between healthcare providers and the supervisory authority, rather than fostering  
36 participative improvement of patient safety for suicidal patients.

37 The similarity in outcomes across the cohorts, regardless of changes in legislation, suggests that the  
38 investigations were adapted to suit the structure of the authority's reports rather than the specific  
39 incident type, and that no new service improvements or lessons are being identified.

40 To develop more sophisticated infrastructures for investigation, learning, and information-sharing, it is  
41 necessary to learn more about preconditions and complexity in the analysis of suicides and the suicidal  
42 process.

43 A shift in investigations' recommendations and reports should be encouraged, to also include learning  
44 from successfully treated and resolved suicide-related crises.

### 45 46 **Acknowledgements**

1  
2  
3 1 The authors are grateful to Region Jönköpings county and Futurum for funding and to Public Health  
4 2 Agency of Sweden for support.

5  
6 3 **Authors' contributor statement**

7  
8 4 EF designed the study, collected and registered the data, made the first analyses and wrote the  
9 5 manuscript. BAG, AR and ÅW contributed to the study design, analyses of the data and revisions of  
10 6 the manuscript. All authors read and approved the final manuscript.

11  
12 7 **Competing interests**

13  
14 8 The authors declare that they have no competing interests.

15  
16 9 **Funding**

17 10 This study was funded by Futurum, the research center at Region Jönköping county.

18  
19 11 **Data sharing statement**

20 12 The complete coding scheme is available by e-mailing [elin.froding@rjl.se](mailto:elin.froding@rjl.se).

21 13 The data of the case reports were obtained from the supervisory authorities, granted by a contract of  
22 14 secrecy. The data can only be obtained by direct request to the supervisory authorities: for cohort 1:  
23 15 The national board of health and welfare, mail: [Registerservice@socialstyrelsen.se](mailto:Registerservice@socialstyrelsen.se), and for cohort 2  
24 16 and 3: Health and Social Care Inspectorate, mail: [samordna.utlamnanden@ivo.se](mailto:samordna.utlamnanden@ivo.se).

25  
26  
27  
28  
29  
30  
31  
32  
33 20 **REFERENCES**

- 34  
35 21  
36  
37 22 1 Kohn LT CJ, Donaldson MS. To err is human: building a safer health system. Washington DC:  
38 23 National Academies Press 2000.  
39 24 2 Leape LL. Reporting of adverse events. *N Engl J Med* 2002;347(20):1633-8. doi:  
40 25 10.1056/NEJMNEJMHpr011493  
41 26 3 Hollnagel E, Wears RL, Braithwaite J. From Safety-I to Safety-II: a white paper. *Published*  
42 27 *simultaneously by the University of Southern Denmark, University of Florida, USA, and*  
43 28 *Macquarie University, Australia: The Resilient Health Care Net 2015*  
44 29 4 Braithwaite J, Wears RL, Hollnagel E. Resilient health care: turning patient safety on its head.  
45 30 *Int J Qual Health Care* 2015;27(5):418-20. doi: 10.1093/intqhc/mzv063  
46 31 5 Stanhope N, Crowley-Murphy M, Vincent C, *et al*. An evaluation of adverse incident  
47 32 reporting. *J Eval Clin Pract* 1999;5(1):5-12. doi: 10.1046/j.1365-2753.1999.00146.x  
48 33 6 Vincent C, Amalberti R. Safety in healthcare is a moving target. *BMJ Qual Saf* 2015;24(9):539-  
49 34 40. doi: 10.1136/bmjqs-2015-004403  
50 35 7 Macrae C, Vincent C. Learning from failure: the need for independent safety investigation in  
51 36 healthcare. *J R Soc Med* 2014;107(11):439-43. doi: 10.1177/0141076814555939  
52 37 8 Macrae C. The problem with incident reporting. *BMJ Qual Saf* 2016;25(2):71-5. doi:  
53 38 10.1136/bmjqs-2015-004732  
54 39 9 Macrae C. Remembering to learn: the overlooked role of remembrance in safety  
55 40 improvement. *BMJ Qual Saf* 2017;26(8):678-82. doi: 10.1136/bmjqs-2016-005547  
56 41 10 Wrigstad J, Bergström J, Gustafsson P. Mind the gap between recommendation and  
57 42 implementation—principles and lessons in the aftermath of incident investigations: a semi-

- 1  
2  
3 1 quantitative and qualitative study of factors leading to the successful implementation of  
4 2 recommendations. *BMJ Open* 2014;4 doi: 10.1136/bmjopen-2014-005326
- 5 3 11 Roos af Hjelmsäter E, Ros A, Gäre BA, *et al.* Deficiencies in healthcare prior to suicide and  
6 4 actions to deal with them: a retrospective study of investigations after suicide in Swedish  
7 5 healthcare. *BMJ Open* 2019;9(12):e032290. doi: 10.1136/bmjopen-2019-032290
- 8 6 12 Kellogg KM, Hettinger Z, Shah M, *et al.* Our current approach to root cause analysis: is it  
9 7 contributing to our failure to improve patient safety? *BMJ Qual Saf* 2017;26(5):381-87. doi:  
10 8 10.1136/bmjqs-2016-005991
- 11 9 13 Mitchell I, Schuster A, Smith K, *et al.* Patient safety incident reporting: a qualitative study of  
12 10 thoughts and perceptions of experts 15 years after 'To Err is Human'. *BMJ Qual Saf*  
13 11 2016;25(2):92-9. doi: 10.1136/bmjqs-2015-004405
- 14 12 14 Leistikow I, Mulder S, Vesseur J, *et al.* Learning from incidents in healthcare: the journey, not  
15 13 the arrival, matters. *BMJ Qual Saf* 2017;26(3):252-56. doi: 10.1136/bmjqs-2015-004853
- 16 14 15 Shojania KG, Thomas EJ. Trends in adverse events over time: why are we not improving? *BMJ*  
17 15 *Qual Saf* 2013;22(4):273-77. doi: 10.1136/bmjqs-2013-001935
- 18 16 16 The Swedish Patient Safety Act (SFS 2010:659) [[https://www.riksdagen.se/sv/dokument-lagar/dokument/svensk-forfattningssamling/patientsakerhetslag-2010659\\_sfs-2010-659](https://www.riksdagen.se/sv/dokument-lagar/dokument/svensk-forfattningssamling/patientsakerhetslag-2010659_sfs-2010-659)].  
19 17 [accessed 2 February 2019].
- 20 18 17 World Health Organization. Suicide data 2018 [Available from:  
21 19 [http://www.who.int/mental\\_health/prevention/suicide/suicideprevent/en/](http://www.who.int/mental_health/prevention/suicide/suicideprevent/en/) [accessed 17  
22 20 October 2018].
- 23 21 18 Mann J, Currier D. Stress, genetics and epigenetic effects on the neurobiology of suicidal  
24 22 behavior and depression. *European Psychiatry* 2010;25(5):268-71.
- 25 23 19 Luoma JB, Martin CE, Pearson JL. Contact with mental health and primary care providers  
26 24 before suicide: a review of the evidence. *Am J Psychiatry* 2002;159(6):909-16. doi:  
27 25 10.1176/appi.ajp.159.6.909
- 28 26 20 Chock MM, Lin JC, Athyal VP, *et al.* Differences in health care utilization in the year before  
29 27 suicide death: a population-based case-control study. *Mayo Clin Proc* 2019;94(10):1983-93.  
30 28 doi: 10.1016/j.mayocp.2019.04.037
- 31 29 21 Cavanagh JT, Carson AJ, Sharpe M, *et al.* Psychological autopsy studies of suicide: a  
32 30 systematic review. *Psychol Med* 2003;33(3):395-405.
- 33 31 22 Arsenault-Lapierre G, Kim C, Turecki G. Psychiatric diagnoses in 3275 suicides: a meta-  
34 32 analysis. *BMC psychiatry* 2004;4(1):37.
- 35 33 23 Bertolote JM, Fleischmann A. Suicide and psychiatric diagnosis: a worldwide perspective.  
36 34 *World psychiatry* 2002;1(3):181.
- 37 35 24 Kapur N. Health services and suicide prevention. *Journal of Mental Health* 2009;18(1):1-5.  
38 36 doi: 10.1080/09638230802370704
- 39 37 25 Quinlivan L, Littlewood DL, Webb RT, *et al.* Patient safety and suicide prevention in mental  
40 38 health services: time for a new paradigm? *Journal of Mental Health* 2020;29(1):1-5. doi:  
41 39 10.1080/09638237.2020.1714013
- 42 40 26 Pirkola S, Sund R, Sailas E, *et al.* Community mental-health services and suicide rate in  
43 41 Finland: a nationwide small-area analysis. *The Lancet* 2009;373(9658):147-53.
- 44 42 27 While D, Bickley H, Roscoe A, *et al.* Implementation of mental health service  
45 43 recommendations in England and Wales and suicide rates, 1997–2006: a cross-sectional and  
46 44 before-and-after observational study. *The Lancet* 2012;379(9820):1005-12.
- 47 45 28 Kapur N, Ibrahim S, While D, *et al.* Mental health service changes, organisational factors, and  
48 46 patient suicide in England in 1997–2012: a before-and-after study. *The Lancet Psychiatry*  
49 47 2016;3(6):526-34.
- 50 48 29 Socialstyrelsens föreskrifter om anmälan av vårdskador enligt lex Maria (SOSFS 2005:28).  
51 49 Stockholm: The Swedish National Board of Health and Welfare.
- 52 50  
53  
54  
55  
56  
57  
58  
59  
60

1  
2  
3  
4  
5  
6  
7  
8  
9  
10  
11  
12  
13  
14  
15  
16  
17  
18  
19  
20  
21  
22  
23  
24  
25  
26  
27  
28  
29  
30  
31  
32  
33  
34  
35  
36  
37  
38  
39  
40  
41  
42  
43  
44  
45  
46  
47  
48  
49  
50  
51  
52  
53  
54  
55  
56  
57  
58  
59  
60

- 1 30 Socialstyrelsens föreskrifter och allmänna råd om vårdgivares systematiska  
2 patientsäkerhetsarbete (HSLF-FS 2017:40). Stockholm: The Swedish National Board of Health  
3 and Welfare.
- 4 2  
5 3  
6 4 31 Swedish association of local authorities and regions. Risk och händelseanalys [Risk analysis  
7 and adverse events analysis]. Stockholm: Swedish association of local authorities and regions  
8 2015.
- 9 6  
10 7 32 Nelson EC, Batalden PB, Godfrey MM. Quality by design: a clinical microsystems approach.  
11 8 San Francisco: Jossey-Bass 2007.
- 12 9 33 The national board of health and welfare. Statistikdatabas för dödsorsaker [Statistical  
13 database, cause of death]: The national board of health and welfare; 2020 [Available from:  
14 [https://sdb.socialstyrelsen.se/ifs\\_dor/resultat.aspx](https://sdb.socialstyrelsen.se/ifs_dor/resultat.aspx) [accessed 2020-02-02].
- 15 11  
16 12 34 Health and Social Care Inspectorate. [https://www.ivo.se/publicerat-material/statistik/lex-  
17 maria-och-lex-sarah/](https://www.ivo.se/publicerat-material/statistik/lex-maria-och-lex-sarah/) [[accessed 2020-02-05].
- 18 14 35 Nicolini D, Waring J, Mengis J. Policy and practice in the use of root cause analysis to  
19 investigate clinical adverse events: mind the gap. *Soc Sci Med* 2011;73(2):217-25. doi:  
20 10.1016/j.socscimed.2011.05.010
- 21 17 36 Runeson B, Odeberg J, Pettersson A, *et al.* Instruments for the assessment of suicide risk: a  
22 systematic review evaluating the certainty of the evidence. *PLoS one* 2017;12(7):e0180292.
- 23 19 37 Carter G, Milner A, McGill K, *et al.* Predicting suicidal behaviours using clinical instruments:  
24 systematic review and meta-analysis of positive predictive values for risk scales. *The British  
25 Journal of Psychiatry* 2017;210(6):387-95.
- 26 22 38 Large M, Smith G, Sharma S, *et al.* Systematic review and meta-analysis of the clinical factors  
27 associated with the suicide of psychiatric in-patients. *Acta Psychiatrica Scandinavica*  
28 2011;124(1):18-19.
- 29 24 39 Suicide NCI, Health SiM. The assessment of clinical risk in mental health services: The  
30 University of Manchester Manchester, 2018.
- 31 26  
32 27 40 Berg SH, Rørtveit K, Walby FA, *et al.* Adaptive capacities for safe clinical practice for patients  
33 hospitalised during a suicidal crisis: a qualitative study. *BMC psychiatry* 2020;20(1):1-12.
- 34 28 41 Probert-Lindström S, Berge J, Westrin Å, *et al.* Long-term risk factors for suicide in suicide  
35 attempters examined at a medical emergency in patient unit: results from a 32-year follow-  
36 up study. *BMJ open* 2020;10(10):e038794.
- 37 31  
38 32 42 Trbovich P, Shojania KG. Root-cause analysis: swatting at mosquitoes versus draining the  
39 swamp. *BMJ Qual Saf* 2017;26(5):350-53. doi: 10.1136/bmjqs-2016-006229
- 40 34 43 Cafazzo JA, St-Cyr O. From discovery to design: the evolution of human factors in healthcare.  
41 *Healthc Q* 2012;15(April (Special Issue)):24-29.
- 42 35  
43 36 44 Mills PD, Neily J, Luan D, *et al.* Actions and implementation strategies to reduce suicidal  
44 events in the Veterans Health Administration. *Jt Comm J Qual Patient Saf* 2006;32(3):130-41.
- 45 38 45 Percarpio KB, Watts BV, Weeks WB. The effectiveness of root cause analysis: what does the  
46 literature tell us? *Jt Comm J Qual Patient Saf* 2008;34(7):391-8. doi: 10.1016/s1553-  
47 7250(08)34049-5
- 48 41 46 Macrae C. Close calls: managing risk and resilience in airline flight safety: Springer 2014.
- 49 42 47 Qin P, Nordentoft M. Suicide risk in relation to psychiatric hospitalization: evidence based on  
50 longitudinal registers. *Arch Gen Psychiatry* 2005;62(4):427-32. doi:  
51 10.1001/archpsyc.62.4.427
- 52 44  
53 45 48 Ballard ED PM, Henderson D, *et al.* Suicide in the medical setting. *Jt Comm J Qual Patient Saf*  
54 2008;34:474-81.

**STROBE 2007 (v4) Statement—Checklist of items that should be included in reports of *cohort studies***

| Section/Topic                | Item # | Recommendation                                                                                                                                                                       | Reported on page # |
|------------------------------|--------|--------------------------------------------------------------------------------------------------------------------------------------------------------------------------------------|--------------------|
| <b>Title and abstract</b>    | 1      | (a) Indicate the study's design with a commonly used term in the title or the abstract                                                                                               | 1                  |
|                              |        | (b) Provide in the abstract an informative and balanced summary of what was done and what was found                                                                                  | 2                  |
| <b>Introduction</b>          |        |                                                                                                                                                                                      |                    |
| Background/rationale         | 2      | Explain the scientific background and rationale for the investigation being reported                                                                                                 | 3-4                |
| Objectives                   | 3      | State specific objectives, including any prespecified hypotheses                                                                                                                     | 4                  |
| <b>Methods</b>               |        |                                                                                                                                                                                      |                    |
| Study design                 | 4      | Present key elements of study design early in the paper                                                                                                                              | 4-5                |
| Setting                      | 5      | Describe the setting, locations, and relevant dates, including periods of recruitment, exposure, follow-up, and data collection                                                      | 4                  |
| Participants                 | 6      | (a) Give the eligibility criteria, and the sources and methods of selection of participants. Describe methods of follow-up                                                           | 4                  |
|                              |        | (b) For matched studies, give matching criteria and number of exposed and unexposed                                                                                                  | Not relevant       |
| Variables                    | 7      | Clearly define all outcomes, exposures, predictors, potential confounders, and effect modifiers. Give diagnostic criteria, if applicable                                             | 4-5                |
| Data sources/<br>measurement | 8*     | For each variable of interest, give sources of data and details of methods of assessment (measurement). Describe comparability of assessment methods if there is more than one group | 4-5                |
| Bias                         | 9      | Describe any efforts to address potential sources of bias                                                                                                                            | 13                 |
| Study size                   | 10     | Explain how the study size was arrived at                                                                                                                                            | 4                  |
| Quantitative variables       | 11     | Explain how quantitative variables were handled in the analyses. If applicable, describe which groupings were chosen and why                                                         | 5                  |
| Statistical methods          | 12     | (a) Describe all statistical methods, including those used to control for confounding                                                                                                | 5                  |
|                              |        | (b) Describe any methods used to examine subgroups and interactions                                                                                                                  | 5                  |
|                              |        | (c) Explain how missing data were addressed                                                                                                                                          | Not relevant       |
|                              |        | (d) If applicable, explain how loss to follow-up was addressed                                                                                                                       | Not relevant       |
|                              |        | (e) Describe any sensitivity analyses                                                                                                                                                | Not relevant       |
| <b>Results</b>               |        |                                                                                                                                                                                      |                    |

|                          |     |                                                                                                                                                                                                                                                                                                                                                                                                               |                                      |
|--------------------------|-----|---------------------------------------------------------------------------------------------------------------------------------------------------------------------------------------------------------------------------------------------------------------------------------------------------------------------------------------------------------------------------------------------------------------|--------------------------------------|
| Participants             | 13* | (a) Report numbers of individuals at each stage of study—eg numbers potentially eligible, examined for eligibility, confirmed eligible, included in the study, completing follow-up, and analysed<br>(b) Give reasons for non-participation at each stage<br>(c) Consider use of a flow diagram                                                                                                               | 6<br>Not relevant<br>Not relevant    |
| Descriptive data         | 14* | (a) Give characteristics of study participants (eg demographic, clinical, social) and information on exposures and potential confounders<br>(b) Indicate number of participants with missing data for each variable of interest<br>(c) Summarise follow-up time (eg, average and total amount)                                                                                                                | 6-7<br>Not relevant<br>Not relevant  |
| Outcome data             | 15* | Report numbers of outcome events or summary measures over time                                                                                                                                                                                                                                                                                                                                                | 7-10                                 |
| Main results             | 16  | (a) Give unadjusted estimates and, if applicable, confounder-adjusted estimates and their precision (eg, 95% confidence interval). Make clear which confounders were adjusted for and why they were included<br>(b) Report category boundaries when continuous variables were categorized<br>(c) If relevant, consider translating estimates of relative risk into absolute risk for a meaningful time period | 7-10<br>Not relevant<br>Not relevant |
| Other analyses           | 17  | Report other analyses done—eg analyses of subgroups and interactions, and sensitivity analyses                                                                                                                                                                                                                                                                                                                | Not relevant                         |
| <b>Discussion</b>        |     |                                                                                                                                                                                                                                                                                                                                                                                                               |                                      |
| Key results              | 18  | Summarise key results with reference to study objectives                                                                                                                                                                                                                                                                                                                                                      | 13                                   |
| <b>Limitations</b>       |     |                                                                                                                                                                                                                                                                                                                                                                                                               |                                      |
| Interpretation           | 20  | Give a cautious overall interpretation of results considering objectives, limitations, multiplicity of analyses, results from similar studies, and other relevant evidence                                                                                                                                                                                                                                    | 11-13                                |
| Generalisability         | 21  | Discuss the generalisability (external validity) of the study results                                                                                                                                                                                                                                                                                                                                         | 11-13                                |
| <b>Other information</b> |     |                                                                                                                                                                                                                                                                                                                                                                                                               |                                      |
| Funding                  | 22  | Give the source of funding and the role of the funders for the present study and, if applicable, for the original study on which the present article is based                                                                                                                                                                                                                                                 | 14                                   |

\*Give information separately for cases and controls in case-control studies and, if applicable, for exposed and unexposed groups in cohort and cross-sectional studies.

**Note:** An Explanation and Elaboration article discusses each checklist item and gives methodological background and published examples of transparent reporting. The STROBE checklist is best used in conjunction with this article (freely available on the Web sites of PLoS Medicine at <http://www.plosmedicine.org/>, Annals of Internal Medicine at <http://www.annals.org/>, and Epidemiology at <http://www.epidem.com/>). Information on the STROBE Initiative is available at [www.strobe-statement.org](http://www.strobe-statement.org).
